## ■ MEDICAL INTELLIGENCE ARTICLE

*Dennis M. Fisher, M.D., Editor*

Anesthesiology  
1999; 91:1891-918  
© 1999 American Society of Anesthesiologists, Inc.  
Lippincott Williams & Wilkins, Inc.

# *Intrathecal Drug Therapy for Chronic Pain*

## *From Basic Science to Clinical Practice*

*Patrick M. Dougherty, Ph.D.,\* Peter S. Staats, M.D.†*

SYSTEMIC analgesics and conservative therapies are effective in controlling chronic pain for the majority of patients. However, many other patients, such as those with advanced head and neck carcinoma and those with neuropathic pain, require more aggressive therapy to directly modulate pain transmission in the central nervous system. Reversible methods of aggressive therapy in the spinal cord include electrical stimulation procedures and intrathecal delivery of analgesics by implanted pumps, both of which are finding ever-expanding roles in pain control. Of these, long-term intrathecal drug therapy is likely to show the largest near-term expansion because the numbers of agents approved for this route of administration are likely soon to increase substantially. Moreover, drug therapy itself will change as treatments using microsome drug encapsulation and novel suspension media are introduced. Further on the clinical horizon is intrathecal cell implantation for the relief of chronic pain. The goal of this review is to update the reader regarding each of these pending advances in intrathecal drug therapy for chronic pain.

\* Associate Professor, Departments of Neuroscience and Neurosurgery.

† Associate Professor, Department of Anesthesiology and Critical Care Medicine.

Received from the Departments of Neuroscience and Neurosurgery and the Department of Anesthesiology and Critical Care Medicine, The Johns Hopkins University School of Medicine, Baltimore, Maryland. Submitted for publication November 6, 1997. Accepted for publication April 30, 1999. Supported by the National Institutes of Health (grant NS-32386; project 2), Bethesda, Maryland.

Address reprint requests to Dr. Dougherty: Department of Neurosurgery, The Johns Hopkins University School of Medicine, 600 North Wolfe Street, Meyer 5-109, Baltimore, Maryland 21287-5354. Address electronic mail to: pmd@research.med.jhu.edu

Key Words: Dorsal horn; primary afferents; spinal cord.

### **Present and Future Intrathecal Analgesics**

Morphine is the only drug presently approved for long-term intrathecal treatment of pain by the United States Food and Drug Administration and by the major manufacturers of infusion pumps for use in their devices. Nevertheless, chronic pain conditions are not always adequately treated by intrathecal opioids alone. Opioids have many unwanted side effects and a significant stigma. Therefore, extensive basic animal and clinical research has focused on identifying alternative classes of analgesics and adjuvants to manage pain.<sup>1</sup> Many receptors and compounds that modulate pain transmission have been identified (Fig. 1).<sup>2</sup> The analgesic properties of drugs active at a variety of these targets are being investigated, both alone and in combination, in humans (table 1).<sup>3</sup> Herein, we review the basic and clinical science of many of these compounds organized on the basis of their function in the spinal dorsal horn. Agents that nonspecifically alter transmission in the dorsal horn by interacting with the ion channels and second-messenger systems that generate action potentials, release synaptic neurotransmitters, and regulate cell excitability are discussed first. We progress to compounds that act on neurotransmitter receptor systems. Finally, we discuss compounds that act on peptide neuromodulator and novel trans-synaptic signal molecule receptor systems.

Various animal models of nociception are used to approximate specific pain conditions in humans. For example, hot plate, tail flick, tail-paw pinch, and shock titration experiments assess analgesic effects on acute cutaneous thermal and mechanical pain. Intraplantar injections of formalin, zymosan, carrageenan or Freund's adjuvant are models of acute and sustained inflammatory pain. Intraperitoneal hypertonic saline, acetic acid, and colorectal distension model acute visceral pain. There are also a number of nerve injury models of human

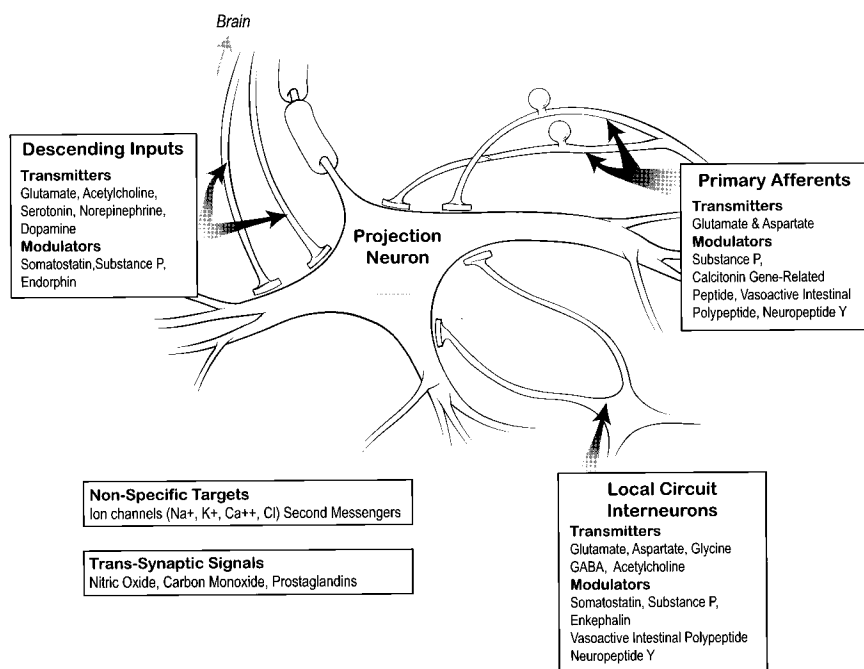

**Fig. 1.** Schematic diagram of the major neurochemicals involved in somatosensory transmission and processing in the spinal dorsal horn. The figure is organized with the pain signaling output neurons of the dorsal horn, the dorsal horn projection neurons, as the central cellular component. These cells are the source of all inputs for pain and temperature to the rostral central nervous system structures, such as the thalamus, brain stem, and hypothalamus, that in turn influence cortical and limbic brain structures necessary for conscious perception and appreciation of pain. The primary afferents that convey input from peripheral tissues to spinal interneurons and projection neurons are shown entering at the right of the figure. The local circuit interneurons that influence the processing of sensory inputs to projection cells are represented by the cell profile at the bottom right. Meanwhile, the inputs to the spinal cord that have come from rostral central nervous system sensory modulatory sites are shown in the cellular component at the top of the figure, alongside the departing axon of the projection cell. The chemicals involved as neurotransmitters (trans-

mitters) and neuromodulators (modulators) associated with each compartment are indicated in the boxes associated with each profile. Boxes at the bottom left list the nonspecific and trans-synaptic signals that provide additional sites for intervention.

neuropathic pain. Despite these models, it is impossible to directly assess the effects of drugs in animals on the complex cognitive experience that humans know and can communicate as pain. Although we refer to certain drugs as showing “analgesic” properties in animals, it is more appropriate to state that these studies assess “antinociceptive” properties. This is because we know that particular stimuli activate nociceptors or produce nociceptive responses and that certain drugs block these activities. The effect of analgesics in animal studies therefore needs validation in humans before a given compound can enter widespread clinical use. Preclinical studies not only need to be designed as thorough, blinded, placebo-controlled studies, but also should evaluate drug toxicity and drug interaction effects. Therefore, our review is intended to update readers regarding the future of intrathecal drug therapy and not as an explicit charge to alter current therapies to include unproven experimental compounds.

#### *Blockade of Ion Channels and Second-messenger Systems*

Propagation of bioelectric signals in the nervous system is crucially dependent on the movement of various ions and the activity of cellular enzymes and metabolites.

The proteins that form ion channels and function as second-messenger enzymes can be blocked by numerous agents, and many of these have been studied as putative analgesics. However, because ion channels and second messengers are found in all neural elements, the effects of compounds acting at these sites are not specific to pain circuitry. Therefore, side effects are often encountered with these drugs that limit their usefulness when given alone. Nevertheless, many compounds in this category will be successful as analgesic adjuvants. The four ion channels involved in pain transmission, those for sodium, calcium, potassium, and chloride, are discussed individually. In contrast, the eight second-messenger enzymes involved in pain transmission (including adenylate and guanylate cyclase; phospholipases A<sub>3</sub>, D, and C; and protein kinases C, A, and G) have complex biochemical interrelations and therefore are discussed as a set.

**Sodium Channels.** Local anesthetics such as lidocaine and bupivacaine inactivate voltage-sensitive sodium channels (fig. 2). The opening of these channels is the primary event underlying the depolarization of nerve membranes and therefore is the key to propagation of neural impulses throughout the nervous system. Dorsal root ganglion neurons have multiple types of sodium

THE FUTURE OF INTRATHECAL ANALGESIA

**Table 1. Human Intrathecal Analgesics**

| Class                                           | Drug                                | Chronic Infusion | Bolus Infusion |
|-------------------------------------------------|-------------------------------------|------------------|----------------|
| Sodium channel antagonists (local anesthetics*) | Bupivacaine                         | Y                | Y              |
|                                                 | Lidocaine                           | Y                | Y              |
|                                                 | Tetracaine                          | Y                | Y              |
| Calcium channel antagonists                     | Verapamil                           |                  | Y              |
|                                                 | Conotoxin                           |                  | Y              |
| NMDA antagonists                                | Ketamine                            |                  | Y              |
|                                                 | CPP                                 |                  | Y              |
| GABA agonists                                   | Midazolam                           |                  | Y              |
|                                                 | Baclofen†                           | Y                | Y              |
| α <sub>2</sub> -Adrenergic agonists             | Clonidine                           | Y                | Y              |
| Acetylcholinesterase inhibitors                 | Physostigmine                       |                  | Y              |
|                                                 | Neostigmine                         |                  | Y              |
| Adenosine agonists                              | Adenosine                           |                  | Y              |
| Opioid agonists                                 | Morphine                            | Y                | Y              |
|                                                 | Hydromorphone                       | Y                | Y              |
|                                                 | Fentanyl                            | Y                | Y              |
|                                                 | Meperidine                          | Y                | Y              |
|                                                 | Sufentanil                          | Y                | Y              |
|                                                 | D-al <sub>a</sub> -D-leu-enkephalin | Y                | Y              |
|                                                 | Dynorphin                           |                  | Y              |
| Somatostatin                                    | Somatostatin                        |                  | Y              |
|                                                 | Octreotide                          | Y                | Y              |

Y = those compounds that have been tested as analgesics by chronic or acute intrathecal administration.

\* Compounds have been tested both alone and in combination with opiates.

† Baclofen has been infused chronically for the treatment of spasticity but not for the treatment of pain.

currents that are mediated by at least one class of tetrodotoxin-sensitive channel and by as many as four tetrodotoxin-resistant sodium channels.<sup>4</sup> Sodium currents in dorsal horn neurons are mediated by at least three types of tetrodotoxin sensitive channels.<sup>5</sup>

The effects of spinally delivered local anesthetics for short-term pain management have been studied in animals and humans for many years.<sup>6</sup> However, use of long-term intrathecal infusion of local anesthetics for pain relief in animals was first investigated in the early 1980s.<sup>7</sup> Since then, these compounds have been used in numerous experimental studies for long-term relief of

somatic, visceral,<sup>8</sup> and neuropathic pain.<sup>9-12</sup> Although relief of experimental measures of pain was often profound in each of these studies, many side effects, including somatic and visceral motor impairment, were encountered.

Prolonged infusion of local anesthetics for postoperative pain in humans became widespread in the 1990s.<sup>13-16</sup> Many patients with cancer and chronic non-malignant pain receive continuous infusions of intrathecal local anesthetics outside of the hospital.<sup>17-20</sup> Intrathecal local anesthetics combined with intrathecal opiates have provided pain relief in each of these conditions, but side effects are common.<sup>17-20</sup> These include delayed urinary retention, paresthesia, paresis-gait impairment, periods of orthostatic hypotension, bradypnea, and dyspnea. The percentages of patients affected by one or more of these side effects varied among studies, ranging from one third to two thirds of all subjects.<sup>17-21</sup> Additionally, tolerance often increased drug requirements to such a large extent that increases in drug concentration (limited by solubility) and increases in drug infusion rate (limited by pump design) did not permit administration of sufficient doses to produce pain relief.<sup>22</sup> Externalized epidural and intrathecal catheters were therefore necessary to maintain analgesia, increasing the risk of infection.

Future local anesthetics for treatment of chronic pain will probably be compounds active at C-fiber-specific

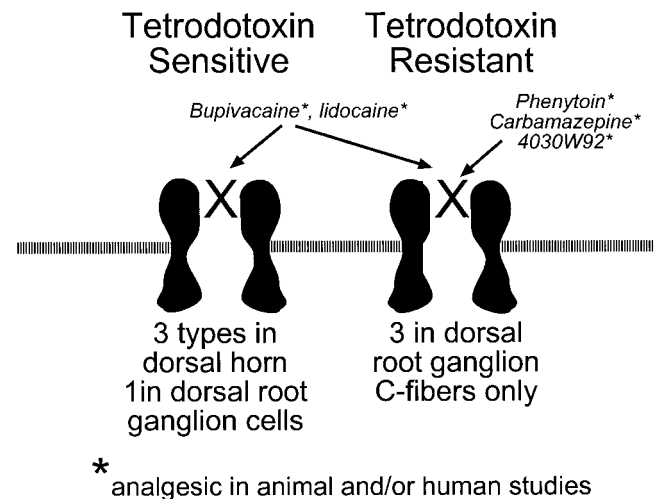

**Fig. 2. Summary of the two major classes of sodium channels involved in somatosensory transmission at spinal levels. Drugs that modify each channel are listed, with arrows indicating sites of action. The "X" indicates blockade of the channel. 4030W92 = 2,4-diamino-5-(2,3-dichlorophenyl)-6-fluoromethylpyrimidine.<sup>34</sup>**

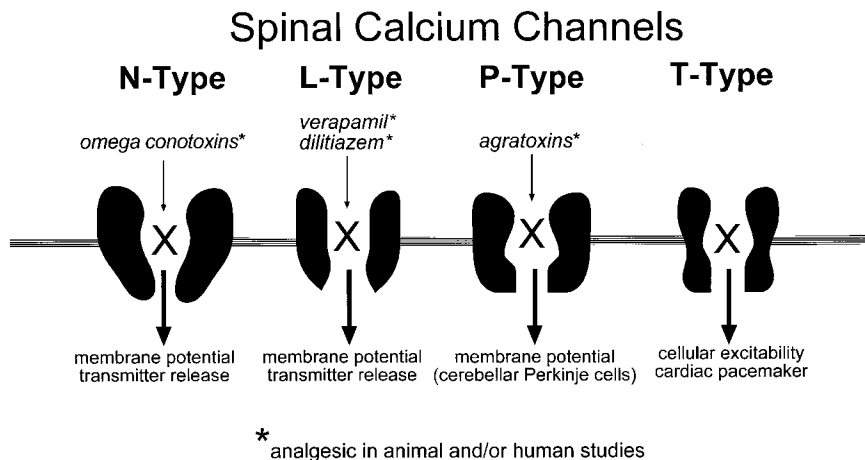

Fig. 3. Summary of the four classes of calcium channels involved in sensory transmission at spinal levels. Drugs that modify each channel are listed, with arrows indicating the sites of action. The "X" indicates blockade of the channel. Some conotoxins block "P"-type channels, but these may not be involved in transmission of sensory information at spinal levels.

sodium channels.<sup>23,24</sup> Tetrodotoxin-resistant sodium channels are concentrated in primary afferent C fibers of the mouse, the rat, and humans and present only at much lower concentrations in other dorsal root and autonomic ganglion neurons.<sup>23-27</sup> Tetrodotoxin-resistant sodium channels are the chief mediators of action potentials in nociceptive C primary afferents,<sup>28</sup> and algescic compounds, such as prostaglandins, specifically increase sodium currents through these channels.<sup>29</sup> Expression of tetrodotoxin-resistant channels increases during the development of nociceptive (inflammatory) pain but undergo down-regulation with development of neuropathic pain.<sup>30-33</sup> Finally, the usefulness and specificity of antagonists at these channels to pain signaling has been substantiated in an animal study with one recently developed compound.<sup>34</sup> Extension of these findings should soon follow, with novel antagonists to these channels based on the chemical structure of the anticonvulsants.<sup>35</sup>

**Calcium Channels.** Calcium ions are essential for regulation of neuronal excitability and for the release of neurotransmitter with synaptic depolarization.<sup>36</sup> At least four types of calcium channels, the L, N, T, and P types, have been identified in dorsal root ganglion and dorsal horn neurons (fig. 3). There are numerous chemical antagonists of L-type calcium channels,<sup>36</sup> whereas N-type calcium channels are blocked using toxins of *Conus magnus*.<sup>37</sup> P channels are especially prevalent in Purkinje cells and are sensitive to venom toxins of the funnel-web spider (*Agelenopsis aperta*).<sup>36</sup> T channels are involved in the regulation of neuronal excitability and pacemaker activity.<sup>38</sup> T channels in dorsal root ganglia are also blocked by some conotoxins.<sup>39</sup>

Mixed antinociceptive effects of intrathecal L-type cal-

cium channel antagonists have been observed in animals. In one series, verapamil alone had little effect on tail-flick latency of rats, although it potentiated the effects of small doses of morphine.<sup>38,40</sup> In contrast, verapamil and diltiazem produced analgesia in the tail-flick and colorectal distension tests<sup>41</sup>; and nifedipine prevented capsaicin-induced mechanical hyperalgesia.<sup>42</sup> N-type calcium channel antagonists have shown a clearer antinociceptive profile in animal studies. Intrathecal administration of conopeptides in rats relieved neuropathic pain,<sup>37,43</sup> attenuated both phases of the formalin test,<sup>37</sup> produced short-term thermal antinociception,<sup>38</sup> and prevented capsaicin-induced hyperalgesia.<sup>42</sup> However, pronounced motor disturbances persisted for 2 or 3 days after administration of high-dose conotoxin in rats.<sup>43</sup>

The analgesic properties of P-type calcium channel antagonists have been evaluated after intraspinal infusion of agatoxins.<sup>42,44</sup> Agatoxin did not affect the responses of rats to short-term noxious mechanical or heat stimuli or to spontaneous pain behaviors after intradermal injection of capsaicin or after joint inflammation. However, agatoxin prevented development of mechanical hyperalgesia after capsaicin and thermal hyperalgesia after joint inflammation.<sup>42,44</sup> Similar effects were reported on dorsal horn neurons after application of agatoxin to the surface of the spinal cord.<sup>45</sup> There was little effect on the responses of single dorsal horn neurons to pressure applied to the knee joint in normal animals. However, agatoxin markedly decreased the response to pressure in neurons from animals with inflamed knee joints.<sup>45</sup>

Both L- and N-type calcium channel antagonists have clinical analgesic properties. Patients who received epi-

## THE FUTURE OF INTRATHECAL ANALGESIA

dural verapamil (in combination with bupivacaine) consumed smaller doses of analgesics postoperatively than patients treated with bupivacaine alone.<sup>46</sup> Similarly, an N-channel antagonist, conotoxin, was analgesic after intrathecal administration to patients with uncontrolled pain caused by malignant disease.<sup>47</sup> Verapamil did not produce any major side effects, whereas side effects similar to those of excessive lidocaine limited the usefulness of conotoxin.<sup>47</sup>

In summary, combinations of L-type calcium channel antagonists with standard analgesics such as morphine will probably find increasing clinical use in the near term. However, the future of calcium channel analgesics will probably follow the course observed in sodium channel research, with efforts to identify C-fiber-specific channel subtypes.

**Potassium Channels.** Potassium is the second main cation of the neuronal action potential. There are two large families of potassium channels: the voltage-gated channels and the inwardly rectifying channels.<sup>48</sup> The voltage-gated channels include the "A" fast-transient conductances sensitive to 4-aminopyridine, barium, and cobalt and the calcium-activated potassium channels sensitive to cobalt, manganese, and cadmium.<sup>49</sup> Dorsal root ganglion neurons are believed to have one to three types of voltage-gated channels and three or four types of delayed rectifier channels.<sup>50,51</sup> Opening of voltage-gated potassium channels allows outward positive current flow from neurons, such as during repolarization after an action potential. Blockade of these channels initially prolongs generation of action potentials.<sup>52</sup> Continued application, however, prevents repolarization and, therefore, ultimately produces a failure to generate action potentials.<sup>52</sup>

Although intrathecal administration of potassium channel antagonists has not been used to treat pain in either animals or humans, 4-aminopyridine is used for long-term intrathecal treatment of spasticity in multiple sclerosis.<sup>53</sup> One side effect of this treatment, paresthesia, is suggested to be caused by preferential blockade of non-myelinated fibers,<sup>54,55</sup> which in turn suggests analgesic potential. However, a number of patients have also reported abdominal pain with these treatments that may relate to abnormal discharge patterns in primary afferent fibers.<sup>55</sup> Potassium channel agonists-antagonists are not likely to be used soon for the treatment of pain.

**Chloride Channels.** Three major classes of chloride channels have been identified.<sup>56</sup> The first class identified was the ligand-gated chloride channels, including those of the  $\gamma$ -aminobutyric acid type A (GABA<sub>A</sub>) and glycine

receptors. The ligand-gated chloride channels are common in dorsal root ganglia and dorsal horn neurons.<sup>57</sup> The second class, also probably common at spinal levels, is the voltage-gated chloride channel.<sup>58</sup> The final chloride channel class is activated by cyclic adenosine monophosphate (cAMP) and may include only the cystic fibrosis transmembrane regulator.<sup>59</sup> Activation of chloride currents usually produces inward movement of chloride to cells that hyperpolarize neurons; facilitation of these hyperpolarizing currents underlies the mechanisms of many depressant drugs. An important exception at spinal levels, however, is that GABA<sub>A</sub> receptors on primary afferent terminals gate a chloride channel that allows efflux of chloride,<sup>60,61</sup> with a net effect therefore of depolarizing primary afferent terminals.

Chloride channel antagonists, such as bicuculline and strychnine, have not been administered to relieve pain, but instead to produce an experimental pain state characterized by a pronounced opiate refractory allodynia.<sup>62-64</sup> These compounds were also used to exacerbate the anatomic consequences of nerve constriction injury.<sup>65</sup> Nevertheless, chloride channels may have paradoxical effects in some pain conditions.<sup>66</sup> As mentioned previously, C-fiber volleys depolarize primary afferent A fibers by activating outward chloride currents through GABA<sub>A</sub> receptor channels.<sup>60,61</sup> This primary afferent depolarization was proposed as a means of limiting painful input to the dorsal horn, consistent with the gate-control theory of pain transmission.<sup>67</sup> However, new evidence suggests that the allodynia produced by intradermal injection of capsaicin is caused by an increased effectiveness of chloride currents evoked by A-fiber "touch"-type afferents on C-fiber nociceptors.<sup>66</sup> If substantiated, chloride channel antagonists may prove to be useful for treatment of chronic pain conditions that have touch-evoked nociceptive components.

**Second-messenger Systems.** Surface receptors affect neuronal activity either by direct gating of an ion channel or by activating biochemical cascades and, therefore, are often classified as either ionotropic or metabotropic, respectively (fig. 4). The transduction of metabotropic receptor activation to biochemical processes involves interactions with a family of so-called G-binding (guanosine triphosphate) proteins.<sup>68-71</sup> G proteins assemble as trimeric complexes composed of  $\alpha$ ,  $\beta$ , and  $\gamma$  subunits that associate physically to surface receptors. The  $\beta$  and  $\gamma$  subunits are constant in all complexes, whereas one of three differing isoforms of the  $\alpha$  subunit confers functional specificity.<sup>68-71</sup> The  $\alpha$  subunit is activated after ligand-receptor interaction by the addition of

## Second Messenger Systems and Pain Signaling

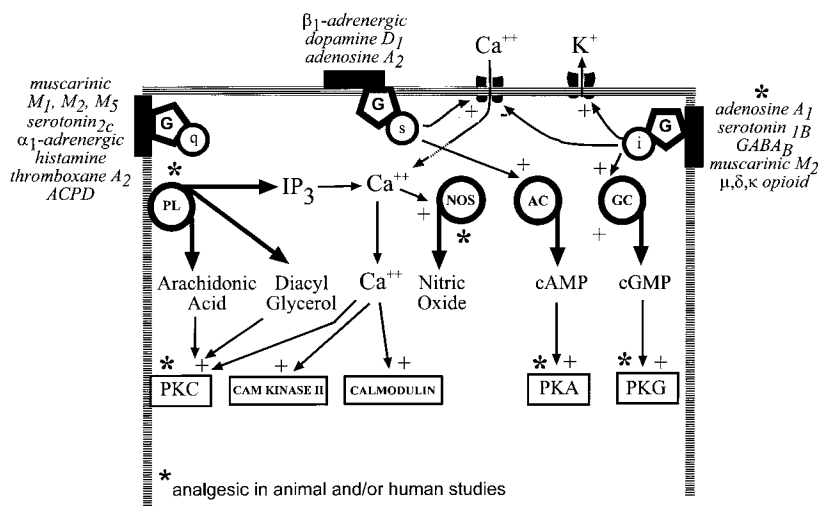

Fig. 4. Schematic summary of the spinal second-messenger systems involved in pain transmission. The figure is organized in columns and rows. Filled rectangles represent surface drug receptors. Compounds that activate each receptor are listed at the side. G-labeled pentagons represent the G-protein  $\beta$  and  $\gamma$  subunits, whereas the circles labeled "q", "s," and "i" represent the three functionally distinct isoforms of the  $\alpha$  subunit. Circles with arrows represent enzymes that generate secondary metabolites as a direct consequence of activity of the G-protein subunits. The products of these enzymes are listed in the center of the figure. Rectangles represent the final tier of enzymes activated in the cascade. The "+" indicates activation or positive modulation, whereas the "-" indicates inactivation or inhibition. \*Indicates those targets for which antagonists were shown to produce antinociception. AC = adenylate cyclase; CamKII = calcium-calmodulin dependent protein kinase II; cAMP = cyclic adenosine monophosphate; cGMP = cy-

lic guanosine monophosphate; GC = guanylate cyclase;  $IP_3$  = inositol triphosphate; NOS = nitric oxide synthase; PKA = protein kinase A; PKC = protein kinase C; PKG = protein kinase G; PL = phospholipase.

guanosine triphosphate, dissociates from the complex, and interacts with and modulates the function of numerous intracellular targets until the bound guanosine triphosphate is autohydrolyzed.<sup>68-71</sup> The  $\alpha_s$  subunit increases conductance at L-type calcium channels, inactivates guanylate cyclase, and activates adenylate cyclase, thereby increasing cellular concentrations of cAMP.<sup>68-70</sup> The  $\alpha_i$  subunit, in contrast, inactivates adenylate cyclase, thereby decreasing levels of cAMP; negatively modulates calcium channels; activates outward potassium currents; and activates guanylate cyclase, thereby increasing cellular cyclic guanosine monophosphate (cGMP). Finally, the  $\alpha_{q,12}$  subunits activate one of several phospholipase enzymes (e.g., phospholipase C, D, or  $A_3$ ), resulting in release of membrane phospholipid metabolites, including arachidonic acid, diacyl-glycerol, and inositol triphosphate.

The metabolites generated by each of the G proteins, in turn, activate one of three types of protein kinases or increase intracellular calcium. Increases in diacylglycerol or arachidonic acid activate the protein kinase C family of enzymes.<sup>72</sup> There are at least 12 isoforms of protein kinase C, although three ( $\alpha$ ,  $\beta$ , and  $\gamma$ ) subtypes predominate in the spinal cord.<sup>70,72</sup> Protein kinases A and G are those families of enzymes activated by cAMP and cyclic guanosine monophosphate (cGMP), respectively. The functions of protein kinases at the spinal level include regulation of tetrodotoxin-sensitive sodium channels in

primary afferent fibers,<sup>28</sup> release of neurotransmitter,<sup>72</sup> and control of excitatory neurotransmitter currents in dorsal horn cells.<sup>73</sup> Intracellular calcium is released from internal stores by binding inositol triphosphate and is stimulated by the action of  $\alpha_s$  on L-type calcium channels. Increases of intracellular calcium activate the enzymes calmodulin, cam kinase II, and nitric oxide synthase.

The role of second-messenger systems on pain sensitivity has been evaluated in a number of studies. Levels of membrane-bound protein kinase C increase after nerve injury<sup>74</sup> and intraplantar injection of formalin.<sup>75</sup> Spinal infusion of phorbol esters to activate protein kinase C increases the behavioral response to intraplantar formalin<sup>76</sup> and increases the spontaneous and evoked activity of primate spinothalamic tract neurons.<sup>77</sup> In contrast, antagonists for protein kinase C decrease pain behavior after nerve injury,<sup>74</sup> intraplantar formalin,<sup>75,76</sup> intraspinal *N*-methyl-D-aspartate (NMDA)<sup>78</sup> and intradermal capsaicin.<sup>79</sup> Similarly, inhibition of phospholipase C<sup>76</sup> or phospholipase A<sup>80</sup> (needed for release of cofactors to protein kinase C) reduced hyperalgesia after intraplantar formalin and zymosan, respectively. Antagonists of protein kinases A and G<sup>79</sup> also decreased capsaicin-induced pain. Finally, animals engineered with defects in protein kinase C had less pain after nerve injury,<sup>81</sup> whereas those engineered with defects in pro-

## Spinal Glutamate Receptors

Fig. 5. Schematic summary of the spinal excitatory amino acid (glutamate) receptors that participate in pain transmission. Excitatory amino acid receptor antagonists that modulate each receptor are listed, with arrows indicating the site of action. The boldface names and solid lines indicate the two classification schemes for these receptors. The “-” indicates antagonist effect.

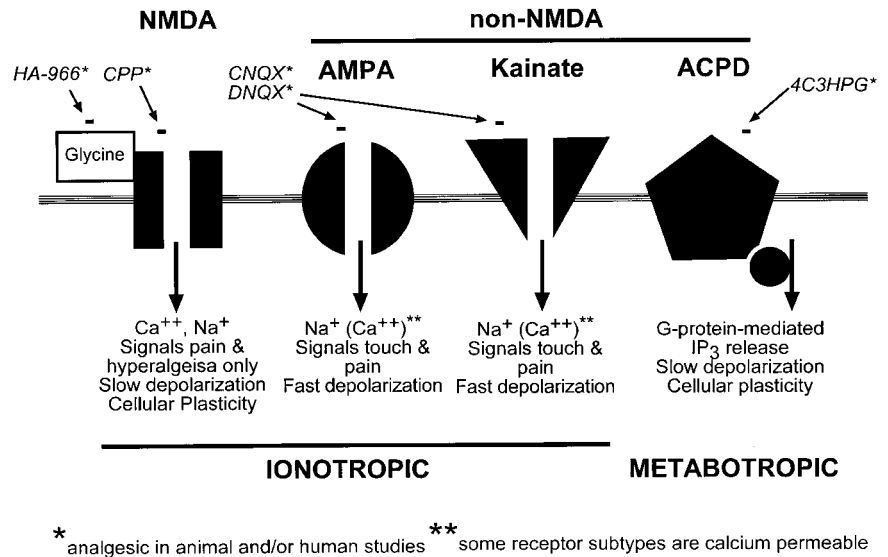

tein kinase A had decreased responses to formalin, capsaicin, and hind-paw inflammation.<sup>82</sup>

In summary, many second-messenger systems may ultimately become targets for clinical pain treatment. However, the role of these systems in pain management is indirect through the action of various drugs that interact with surface receptors linked to G proteins. Receptors linked to G<sub>s</sub> (receptors associated with  $\beta\gamma\alpha_s$  subunits) include the  $\beta_1$ -adrenergic, dopaminergic type 1, and adenosine type 2 receptors. Those that activate G<sub>q,12</sub> ( $\beta\gamma\alpha_{q,12}$ ) include the serotonin 2c,  $\alpha_1$ -adrenergic; histamine; thromboxane A<sub>2</sub>; metabotropic glutamate; and muscarinic types 1, 3, and 5 receptors. Finally, G<sub>i</sub> ( $\beta\gamma\alpha_i$ )-linked receptors include adenosine 1; serotonin 1B; GABA<sub>B</sub>; muscarinic type 2; and  $\mu$ -,  $\delta$ -, and  $\kappa$ -opioid receptors.<sup>68</sup> As reviewed in the after-sections, neurotransmitter receptors linked to G<sub>s</sub> and G<sub>q,12</sub> generally increase pain transmission, whereas G<sub>i</sub>-linked receptors inhibit pain signaling.<sup>68-70,83</sup>

#### Blockade or Facilitation of Neurotransmitter Function

Neurotransmitters are the chemicals that mediate transmission of action potentials at synaptic junctions between neurons. There are four major groups of neurotransmitters in the spinal dorsal horn: excitatory amino acids, inhibitory amino acids, monoamines, and purines. All are relatively small molecular-weight compounds. Their rapid release and reuptake (degradation)

yields a corresponding rapid time course in effects, usually measured in the range of milliseconds. Most pharmacologic agents act by either blocking or mimicking neurotransmitter actions.

**Excitatory Amino Acids.** The amino acids glutamate and aspartate are the main excitatory neurotransmitters of somatosensory transmission pathways. Glutamate and aspartate are present in peripheral nerves, dorsal root ganglia and axons, and cells of the dorsal horn.<sup>2,84-87</sup>

There are at least four distinct types of excitatory amino acid receptors named for the selective synthetic agonists that bind to them<sup>88</sup> (fig. 5). The sites that bind NMDA define the NMDA receptors. These have the highest affinity for the natural ligand aspartate and form an ion channel that is permeable to calcium (and sodium and potassium).<sup>88</sup> NMDA receptors are selectively blocked by a number of chemical antagonists, such as CPP. Ketamine and dextromethorphan are also NMDA antagonists; however, both act on nonexcitatory amino acid receptors.<sup>88</sup> Ketamine, for example, binds to  $\sigma$  opioid and serotonin receptors.<sup>88</sup> NMDA receptors are blocked at resting membrane potentials by magnesium. Relief of this blockade requires depolarization of the cell by other synaptic inputs, which means NMDA receptors function as detectors of temporally coincident synaptic events.<sup>89</sup> The combined features of calcium permeability and coincidence detection are thought to be the keys to NMDA-receptor mediation of heterosynaptic (Hebbian) plasticity in neural pathways, such as that underlying

hippocampal long-term potentiation and dorsal horn neuron sensitization.<sup>89,90</sup>

Non-NMDA excitatory amino acid receptors include three distinct sites. The first of these selectively binds AMPA and the second selectively binds kainate. Glutamate has its highest affinity for AMPA and kainate receptors.<sup>91-93</sup> Most AMPA and kainate receptors form monovalent cationic channels, although subtypes of each have been identified that are also permeable to calcium.<sup>94,95</sup> Although antagonists for these receptors, such as CNQX and DNQX, do not select between the AMPA and kainate binding sites, the receptors have differential sensitivity to antagonists of receptor desensitization.<sup>96,97</sup> Finally, the third non-NMDA site selectively binds ACPD and is blocked by 4C3HPG. The ACPD receptor, in contrast to the NMDA, AMPA, and kainate receptors, is a G-protein-linked complex that initiates inositol phospholipid metabolism when activated. This feature results in a second partitioning of excitatory amino acid receptors into ionotropic (NMDA, AMPA, kainate) and metabotropic (ACPD) subtypes.

All four excitatory amino acid receptors mediate somatosensory transmission in the dorsal horn. Intrathecal injection of NMDA, AMPA, and kainate produced nociceptive biting and scratching behavior,<sup>98</sup> whereas injection of ACPD increased the behavioral responses to intraplantar formalin.<sup>99</sup> Intrathecal injection of NMDA antagonists has little effect on the responses to acute nociceptive stimuli in normal animals but markedly decreases touch and heat hyperalgesia after peripheral inflammation or nerve injury.<sup>100-103</sup> Similar effects have been observed after intrathecal injection of magnesium sulfate.<sup>104</sup> In contrast, intrathecally administered AMPA and kainate receptor antagonists reduce behavioral responses to short-term nociceptive stimuli and after induction of hyperalgesia.<sup>103,105,106</sup> However, AMPA and kainate antagonists, unlike NMDA antagonists, impair motor function at analgesic doses.<sup>103,105,106</sup> Finally, metabotropic receptor antagonists had no effect in a model of postoperative pain<sup>107</sup> but reduced the behavioral responses to intraplantar formalin,<sup>99</sup> and treatment with metabotropic receptor antisense oligonucleotide increased tail-flick latency.<sup>108</sup>

Neurophysiology studies confirm the roles of excitatory amino acids in pain transmission. Ionotropic glutamate receptor agonists increase<sup>109-114</sup> and antagonists decrease the responses of dorsal horn neurons to somatosensory stimuli.<sup>91,93,115-124</sup> Non-NMDA-receptor antagonists decreased the transmission of both noxious and non-noxious information, whereas NMDA-recep-

tor antagonists selectively attenuated responses to sustained noxious stimuli.<sup>92,93</sup> ACPD produced excitation of nociceptive neurons in monkeys and rats and a selective increase in responses to innocuous cutaneous stimuli.<sup>125,126</sup> The majority of synapses activated by primary afferent fibers on arrival to the dorsal horn are mediated by the "fast" ionotropic non-NMDA (AMPA and kainate) receptors. NMDA receptors are recruited with polysynaptic activation of intrinsic dorsal horn neurons and are essential for induction of hypersensitivity of dorsal horn cells after injury. Influx of calcium through the NMDA receptor is the crucial first step in initiation of hypersensitivity.<sup>101</sup> In turn, increased intracellular calcium increases resting membrane potential and membrane resistance and initiates changes in gene expression. Long-term maintenance of hypersensitivity requires coincident activation of neuropeptide receptors involving either G<sub>s</sub>- or G<sub>q</sub>-mediated biochemical cascades.<sup>127</sup> Finally, ACPD receptors appear to affect global sensitivity of multireceptive dorsal horn neurons to innocuous and noxious stimuli and, therefore, function to control the gain of these neurons to peripheral inputs.<sup>126</sup>

Clinical analgesia trials have been begun with NMDA antagonists.<sup>128-130</sup> Intrathecal ketamine has consistently produced analgesia at dosages of 50 mg and more, although this dosage is also analgesic when given systemically.<sup>131-133</sup> Limitations to intrathecal use of ketamine include its well-described psychotropic effects.<sup>128</sup> Additionally, vacuolar myelopathy has been reported in a patient who received intrathecal ketamine.<sup>129</sup> Although this neurotoxicity might be attributed to preservative in the preparation,<sup>129</sup> similar toxicity was observed in animals administered preservative-free ketamine.<sup>134</sup> Finally, a "pure" NMDA antagonist, CPP, relieved intractable neurogenic pain in a single patient trial, although psychotropic side effects were encountered.<sup>135</sup> In summary, studies in animals suggest that excitatory amino acid receptor antagonists have promise as future analgesics. However, preliminary clinical studies with these compounds indicate limitations.

**Inhibitory Amino Acids.**  $\gamma$ -Aminobutyric acid and glycine are the inhibitory amino acid neurotransmitters of the spinal dorsal horn.<sup>136,137</sup> Three types of GABA receptors and two glycine receptors have been identified,<sup>138-140</sup> although a fourth distinct GABA receptor may be expressed by human dorsal root ganglion neurons<sup>141</sup> (fig. 6). The GABA<sub>A</sub> receptor is part of a chloride ionophore complex.<sup>142,143</sup> Selective GABA<sub>A</sub> agonists include muscimol; selective antagonists include gabazine. Barbiturates and alcohol modulate activity at this recep-



## Spinal GABA Receptors

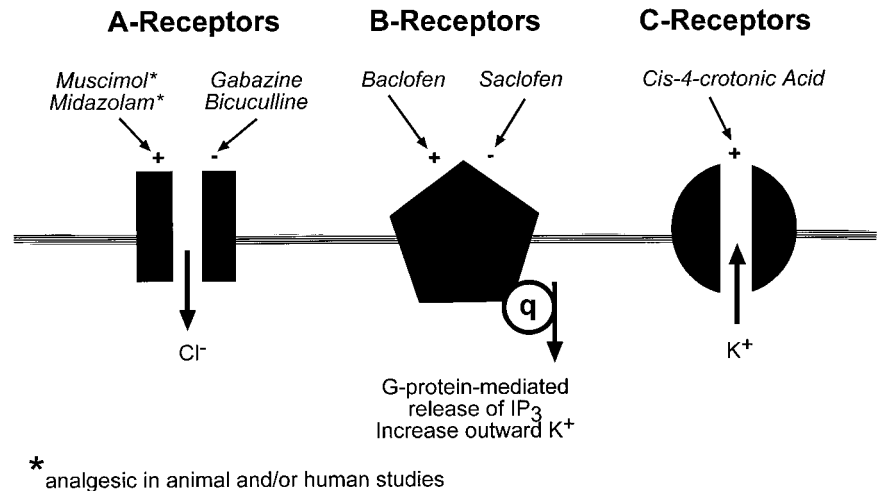

Fig. 6. Summary of the spinal GABA receptors involved in pain transmission. Agonists and antagonists active at each receptor are listed, with arrows indicating the site of action. The "+" indicates agonist function and the "-" indicates antagonist function.

tor by direct facilitation of inward chloride currents.<sup>142,143</sup> Benzodiazepines bind to a unique site on the GABA<sub>A</sub> receptor complex that facilitates GABA receptor-agonist binding and, therefore, increases channel open time.<sup>136,138,140</sup> The GABA<sub>B</sub> receptor is a G-protein-linked complex that, when activated, typically increases outward potassium currents.<sup>144</sup> Baclofen is a selective GABA<sub>B</sub> receptor agonist and phaclofen is a selective antagonist. It has been suggested that the newly described GABA<sub>C</sub> receptor is directly associated with a potassium channel ionophore. *Cis-4-aminocrotonic acid* is a selective GABA<sub>C</sub> receptor agonist, but there is no selective antagonist for these receptors.

Glycine receptors include one subtype linked to a chloride ionophore and sensitive to the antagonist strychnine. The second is a strychnine-insensitive modulatory site on the NMDA-receptor complex antagonized by HA-966.<sup>139,140</sup>

Both GABA<sub>A</sub> and GABA<sub>B</sub> agonists have analgesic properties after intrathecal administration in a number of pain models in animals. Muscimol and baclofen blocked both the allodynia produced by a long-term nerve constriction injury<sup>145</sup> and the biting and scratching behavior elicited by intrathecal injection of substance P.<sup>146</sup> Similarly, muscimol and baclofen each produced antinociception in phases 1 and 2 of the formalin model<sup>147</sup> and in the electrical current threshold test in rats<sup>148</sup> and monkeys.<sup>149</sup> Midazolam, similar to muscimol and baclofen, produced antinociception in the hot plate, tail-flick and electric current threshold test in rats.<sup>150-154</sup> Of note, the baclofen-induced increase of tail-flick latency and inhibi-

tion of hot plate responses were attenuated by pretreatment with pertussis toxin,<sup>155</sup> and the effects of midazolam were additive with that of morphine.<sup>151</sup> Therefore, GABA<sub>B</sub> receptors and opioid receptors probably access complementary G-protein systems ( $G_i$ ) in the dorsal horn.

GABA<sub>A</sub> and GABA<sub>B</sub> receptor antagonists enhance nociceptive behaviors after intrathecal injection in rats.<sup>156</sup> However, a long-term facilitation of the flexor withdrawal reflex was produced by intrathecal injection of the GABA<sub>A</sub> receptor antagonist bicuculline but not by a GABA<sub>B</sub> antagonist.<sup>64</sup> These results indicate that GABA<sub>A</sub> receptors mediate a tonic inhibition, whereas GABA<sub>B</sub> receptors mediate a stimulus-driven inhibition of spinal pain-signaling (somatosensory) pathways.

Intrathecal administration of glycine in awake animals decreased responses to noxious heat<sup>157</sup> and inhibited substance P-induced biting and scratching.<sup>146</sup> Similarly, iontophoresis of glycine profoundly inhibited the responses of spinal neurons to all peripheral stimuli,<sup>158,159</sup> probably by a direct membrane hyperpolarization.<sup>158</sup> Strychnine facilitates flexor withdrawal<sup>64</sup> and produces morphine-insensitive allodynia in rats.<sup>62,63</sup> Finally, administration of the strychnine-insensitive glycine receptor antagonist HA-966 predictably results in effects similar to those of NMDA antagonists, including reduction of responses to noxious, but not non-noxious, stimuli.<sup>160</sup>

Although antinociception is well-demonstrated with intrathecal GABA agonists in animal studies, similar analgesic effects in humans have not been produced consistently. Intrathecal injection of the GABA<sub>A</sub> agonist mi-

dazolam was effective in treating chronic mechanical low back and postoperative pain.<sup>161,162</sup> Long-term midazolam treatment also successfully relieved chronic non-malignant musculoskeletal and neurogenic pain without evidence of toxicity.<sup>163</sup> However, midazolam did not have an independent effect on pain of peripheral arteriopathy or in malignant disease.<sup>163</sup>

Intrathecaly administered GABA<sub>B</sub> agonists have also shown mixed results for pain relief. Intrathecal baclofen is approved by the Food and Drug Administration of the United States and is widely used for the relief of spasm in spinal cord injury, cerebral palsy, and multiple sclerosis.<sup>164-171</sup> Baclofen has also been used to relieve central poststroke and musculoskeletal pain<sup>164,172</sup> However, in other studies, baclofen was ineffective for neurogenic pain in patients with spinal cord injury<sup>173</sup> and had no effect on pinch-evoked or musculoskeletal pain.<sup>174</sup>

In summary, the usefulness of intrathecal GABA receptor analgesics in humans remains open to question. Basic science studies have emphasized that GABA<sub>A</sub> and GABA<sub>B</sub> agonists have analgesic effects that are very modality specific. For example, muscimol, but not baclofen, antagonized the biting and scratching behavior elicited by intrathecal injection of the excitatory amino acid agonists NMDA, quisqualic acid, and kainate.<sup>175</sup> In contrast, baclofen, but not midazolam, attenuated formalin-evoked pain behaviors.<sup>151</sup> Future clinical studies with these compounds may show more consistent effects as the conditions most appropriate for each agonist subtype in humans are clarified.

The effects of intrathecaly administered glycine or glycine antagonists, such as HA-966, in humans have not been reported.

**Monoamine. Norepinephrine.** Norepinephrine was first detected in fibers of the dorsal lateral spinal funiculus in the late 1960s.<sup>176</sup> Potential analgesic effects were not considered, however, until inhibition of dorsal horn neurons by microstimulation of norepinephrine-containing brain stem nuclei was shown in the late 1970s.<sup>177</sup> The native receptors for norepinephrine include two broad classes, the  $\alpha$ - and  $\beta$ -adrenergic receptors, of which there are multiple subtypes (e.g.,  $\alpha_{1a}$ ,  $\alpha_{1b}$ ,  $\alpha_{2a}$ ,  $\alpha_{2b}$ ,  $\beta_1$ ,  $\beta_2$ ).

$\alpha$ -Adrenergic receptors, in particular  $\alpha_2$  receptors, have antinociceptive properties in many models of acute pain in rats, cats, and monkeys.<sup>178</sup> This includes an increase in shock titration assay,<sup>149</sup> suppression of the flexion withdrawal reflex,<sup>179</sup> increase in tail-flick and hot plate latencies,<sup>151,155,180-183</sup> and inhibition of responses to colorectal distension<sup>184</sup> and noxious compression of

skin.<sup>185,186</sup>  $\alpha_2$  Agonists also have antinociceptive properties in animal models of prolonged and chronic pain, including the formalin test,<sup>187</sup> experimental neuropathy,<sup>188</sup> spinal cord ischemia,<sup>179</sup> and autotomy.<sup>189</sup>

Epidural clonidine recently was approved for treatment of intractable pain, and intrathecal clinical trials are now being conducted. Intrathecal infusion of clonidine with hydromorphone or other opiates provided relief of intractable cancer pain.<sup>190,191</sup> Intrathecal clonidine was also effective for management of reflex sympathetic dystrophy and postoperative pain,<sup>191,192,193</sup> and prolonged the effects of local anesthetics and potentiated the effectiveness of other agents used in neuraxial delivery.<sup>194</sup> The interactions of clonidine with morphine and other opiates may be a result of combined effects of both agents in reducing calcium currents in presynaptic terminals. Alternatively, the effects of clonidine may be mediated, in part, by local release of acetylcholine.<sup>191</sup>

Although intrathecal clonidine has promise as an adjunctive analgesic compound, clinical use has been limited by a number of side effects, most particularly, hypotension and bradycardia.<sup>195,196</sup> Thus,  $\alpha_2$ -adrenergic compounds need further improvement before they can be used widely.

**Dopamine.** Dopamine is found in axon terminals in the superficial laminae of the dorsal horn. These terminals arise from cells at supraspinal levels that send axons to the spinal cord *via* the dorsal lateral spinal funiculus.<sup>197</sup> Intrathecal injection of dopamine and dopamine receptor agonists increased tail-flick latency<sup>198,199</sup> and decreased hot plate and acetic acid writhing.<sup>200</sup> This effect was blocked by a type 2 dopamine but not by a type 1 receptor antagonist.<sup>198,199</sup> Interestingly, the analgesia of spinal apomorphine is reduced by naloxone<sup>201</sup> and dopamine-2 receptor agonists facilitated the motor effects of morphine,<sup>202</sup> suggesting reciprocal interactions between spinal opioid and dopamine receptor systems.

Patients with dysfunction of endogenous dopamine systems, such as Parkinson's disease, often have an accompanying pain syndrome.<sup>203</sup> However, no studies have evaluated the possible analgesic effects of dopamine in these or other patients.

**Serotonin.** Increases in serotonin, or 5-hydroxytryptamine, in the spinal dorsal horn after microstimulation of brain stem pain inhibitory nuclei suggest antinociceptive activity for this monoamine.<sup>177,180,204</sup> Serotonin is present in terminals in the dorsal horn, primarily in laminae I and II, the intermediolateral cell column, and the ventral horn. Serotonin colocalizes with several peptides, including enkephalin, somatostatin,

calcitonin gene-related peptide, substance P, and the neurotransmitter GABA. There are at least three serotonin receptor classes in the dorsal horn termed 1, 2, and 3, each of which has multiple subtypes.<sup>205</sup> The effect of these receptors in control of pain remains unclear. Intrathecal serotonin produced antinociception in tail-flick, hot plate, paw pressure, intraplantar formalin, and shock titration experiments in mice and rats.<sup>180;206-209</sup> Yet, in other studies, serotonin facilitated input to dorsal horn cells from primary afferent C fibers and facilitated paw pressure and tail-flick responses.<sup>205,209,210</sup> Intrathecal studies with more selective serotonin receptor agonists have not clarified these discrepancies. For example, one group reported serotonin-1a receptor agonists inhibit hot plate responses,<sup>211</sup> whereas others reported a facilitation of tail flick.<sup>210,212</sup> Intrathecal-1b receptor agonists were analgesic in tail-flick and colorectal distension tests<sup>210,212-214</sup> but without effects on hot plate responses.<sup>211</sup> Similarly, serotonin type 2 receptors enhanced nociceptive responses in some studies<sup>215,216</sup> and reduced responses in others<sup>213,214</sup> Intrathecal type 3 agonists were also pro-<sup>217</sup> and antinociceptive.<sup>208</sup> Thus, serotonin modulates pain transmission; however the receptor mechanisms that govern these effects are poorly defined. Possible confounding factors in previous studies are that serotonin differentially regulates nociceptive stimuli of varying modality,<sup>209</sup> the distribution of serotonin receptor subtypes varies between spinal regions,<sup>215</sup> and the drugs available have been inadequately selective. Further study with more selective pharmacologic tools will be needed to resolve these issues before initiation of clinical studies.

**Acetylcholine.** Another potentially analgesic member of the monoamine family is acetylcholine. Cholinergic terminals are abundant in the dorsal horn, arising from brain stem raphe nuclei,<sup>218</sup> the nucleus ambiguus, the dorsal motor nucleus of the vagus,<sup>177</sup> and local dorsal horn neurons.<sup>219</sup> Spinal cholinergic receptors include nicotinic and muscarinic 1 and 2 subtypes.<sup>220</sup> Although intrathecal injections of acetylcholine had no effect on nociceptive responses of animals, injection of synthetic cholinergic agonists were antinociceptive in a number of behavioral paradigms. For example, carbachol and oxotremorine produced antinociception in tail-flick, hot plate, and acetic acid writhing tests.<sup>183</sup> These effects were additive to that of morphine,<sup>151,221,222</sup> were prevented by atropine and pirenzepine<sup>223</sup> but not by *d*-tubocurarine, and were not reproduced with nicotine.<sup>222</sup> These results suggest that spinal muscarinic-1 and -2 receptors are antinociceptive but nicotinic recep-

tors are not. This conclusion, however, may be premature based on recent studies with a novel nicotinic cholinergic agonist that had an excellent antinociceptive profile after systemic administration.<sup>224</sup>

Intrathecal injection of acetylcholinesterase inhibitors also produced analgesia in animal studies.<sup>225</sup> Although the analgesic effects of the cholinesterase inhibitors were transient, the effects were synergistic to those of clonidine and morphine, resulting in a profound and long-lasting analgesia. Side effects described as "abnormal behavior" were observed in these studies that were reduced with clonidine.<sup>225</sup>

Clinical studies of acetylcholinesterase inhibitors have begun.<sup>226</sup> Intrathecal administration of neostigmine produced antinociception to a cold stimulus in normal human volunteers<sup>226,227</sup> and relieved visceral and somatic postsurgical pain.<sup>228,229</sup> However, side effects included nausea, emesis, reversible lower extremity paresis,<sup>226-230</sup> tachycardia, hypertension, sedation, and anxiety.<sup>226,227</sup> Application of cholinesterase inhibitors with opiates did not increase the incidence of nausea or emesis, although postsurgical analgesia was produced at lower doses of each drug than when either was given alone.<sup>231</sup> In summary, cholinesterase inhibitors have promise as novel independent analgesics and as adjuvants to established analgesics such as morphine. However, a solution to the side effects of nausea and emesis may be needed before widespread use of these compounds.

**Tricyclic Antidepressants.** Tricyclic antidepressants have long been known to modulate pain transmission. This effect is believed to be a result of inhibition of reuptake and consequent increases in norepinephrine and serotonin. However, there is uncertainty regarding the mechanism of analgesia of tricyclics. For example, *in vitro* studies have shown that tricyclics bind to the NMDA-receptor complex,<sup>232,233</sup> suggesting that the hyperalgesia and allodynia treated by tricyclics is caused by NMDA-receptor inhibition, rather than by increases in levels of serotonin or norepinephrine. Intrathecal injection of desipramine or amitriptyline decreased NMDA-induced pain behaviors in a dose-dependent fashion.<sup>234,235</sup> These effects were unaffected by coadministration of phentolamine or methysergide, suggesting that monoamines were not involved.<sup>235</sup> Clinical application of intrathecal tricyclic antidepressants is not possible because preservative-free preparations are not available, toxicology has not been assessed, and motor weakness developed at high doses in rat experiments.<sup>235</sup> In that tricyclics are synergistic with opiates<sup>236</sup> and po-

## Adenosine\* Receptors and Pain Signalling

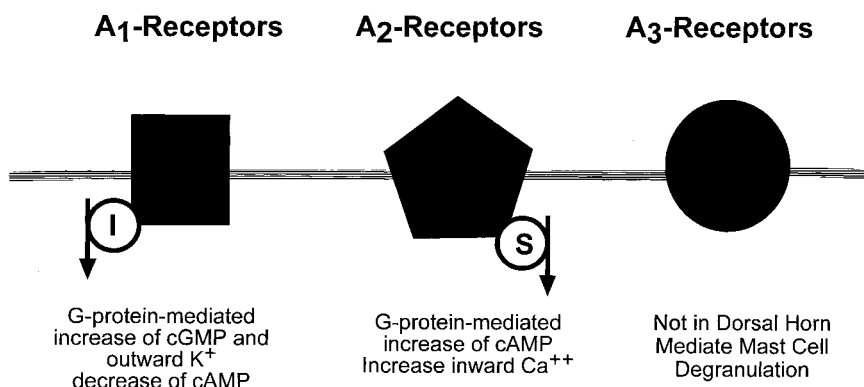

Fig. 7. Schematic summary of the spinal adenosine receptors involved in pain transmission. Subtype-selective agonists-antagonists have not yet been studied and therefore are not listed.

\* analgesic in animal and/or human studies

tently decrease inflammatory hyperalgesia,<sup>235</sup> further attention should be devoted to this potentially effective mode of pain control.

**Purines.** Evidence has accumulated during the past several years that adenosine and adenosine triphosphate are somatosensory neurotransmitters.<sup>237</sup> There are at least three types of adenosine receptors, termed 1-3, each with differing effects on target cells (fig. 7). Adenosine 1 receptors link to the G<sub>i</sub>-protein subunit and therefore inhibit target cells by decreasing cAMP<sup>238,239</sup> and facilitating currents at adenosine triphosphate-sensitive potassium channels.<sup>240</sup> In contrast, adenosine 2 receptors link to the G<sub>s</sub>-protein subunit and therefore excite target cells by increasing the activity of adenyl cyclase.<sup>238</sup> Type 3 adenosine receptors are not present in the dorsal horn, but rather are expressed in dermal mast cells.<sup>237</sup> Activation of adenosine 3 receptors provokes pain as a result of mast cell degranulation and the release of serotonin and histamine.<sup>241</sup>

Adenosine produces pain when administered peripherally but produces analgesia when administered spinally.<sup>237</sup> For example, intrathecal adenosine produced antinociception in the rat tail-flick test. This effect was enhanced by supplemental calcium.<sup>242</sup> The mixed type1-type 2 receptor agonist 5'-N-ethylcarboxamide adenosine produced analgesia in rats that was enhanced by clonidine.<sup>243</sup> Adenosine produced antinociception in the hot plate test in mice.<sup>180</sup> Intrathecal administration of type 1 receptor agonists decreased the discharges of deep dorsal horn cells to C-fiber volleys.<sup>244</sup> The antinociception produced by adenosine was inhibited by methylxanthines, confirming that adenylate cyclase is involved in these effects. Many reports

cite a role for adenosine in morphine-produced antinociception that may be a result of a shared action on adenylate cyclase.<sup>244-248</sup> Adenosine and opiate-like substances may also mediate norepinephrine-produced antinociception.<sup>246</sup>

Four studies have addressed the role of adenosine in pain transmission in humans. Intravenous and subcutaneous administration of adenosine caused pain in healthy subjects,<sup>237</sup> but intravenous adenosine relieved neuropathic pain in one study.<sup>249</sup> Adenosine decreased spontaneous and touch-evoked pain in healthy volunteers after application of mustard oil<sup>250</sup> and relieved neuropathic allodynia.<sup>251</sup> No significant complications or side effects were reported, although one volunteer experienced transient lumbar pain with drug injection.<sup>251,252</sup> Further study with intrathecal adenosine and adenosine-receptor selective agonists should be of interest.

### *Blockade or Facilitation of Neuromodulator Receptors*

Neuromodulators are substances that adapt the action of neurotransmitters to varying biologic conditions.<sup>49,253</sup> Similar to transmitters, modulators are released at synapses and act on specific membrane receptor sites. Unlike transmitters, the time course of neuromodulator effects is long, with effects measured in seconds to minutes. The sites of action for neuromodulators are not necessarily confined to a single synapse. Modulators often spread from their site of release and through tissue after high-intensity stimulation to affect synapses at a distance.<sup>254</sup> The majority of neuromodulators are relatively large-molecular-weight peptides.

**Opioid Receptors.** The natural opioids include the peptides  $\beta$ -endorphin, leu-enkephalin, and met-enkephalin and dynorphin derived from the *proopiomelanocortin*, *proenkephalin*, and *prodynorphin* genes, respectively.<sup>255</sup> The opioid peptides are found in axon terminals and cell bodies throughout the spinal dorsal horn, although mostly in the superficial laminae.<sup>177</sup> The nerve terminals containing opioid peptides arise from dorsal root ganglia, cells intrinsic to the dorsal horn, and cells of various brain stem nuclei that descend *via* the dorsal lateral funiculus.

Opioid agonists exert their effects at  $\mu$ ,  $\delta$ , and  $\kappa$  receptors. All three consist of seven transmembrane spanning G-protein-coupled complexes.<sup>256,257</sup> Dorsal horn opioid receptors are located presynaptically on capsaicin-sensitive small-diameter primary afferent nerve endings<sup>258-260</sup> and postsynaptically on dendrites and somata of intrinsic neurons.<sup>177</sup> Inhibition of transmitter release from primary afferent nerve terminals by suppression of voltage-gated calcium currents is one widely recognized mechanism for opioid-induced analgesia.<sup>256,257</sup> A second is direct inhibition of dorsal horn neurons by inhibition of adenyl cyclase and activation of outward potassium currents.<sup>177,261</sup> Synthetic opioid receptor-selective agonists include the nonpeptide compounds morphine ( $\mu$ -agonist) and trans-3,4-dichloro-*N*-methyl-*N*-[2-(1-pyrrolidinyl)-cyclohexyl] benzeneacetamide (U50488,  $\kappa$ -agonist) and peptide analogs such as D-Pen<sup>2</sup>-D-Pen<sup>5</sup>-enkephalin ( $\delta$ -agonist).

A number of studies in animals have established the analgesic effects of intrathecal morphine to short-term noxious stimuli. For example, intrathecal morphine increases shock-titration threshold in monkeys,<sup>149</sup> suppresses the responses of rats to colorectal distension,<sup>262</sup> decreases hyperalgesia in a model of postoperative pain,<sup>263</sup> and increases tail-flick and hot plate latencies in rat.<sup>155</sup> Intrathecal morphine also decreases the discharge of deep dorsal horn cells to C-fiber volleys.<sup>244,264</sup> These effects of morphine are mimicked by the natural  $\mu$ -agonist  $\beta$ -endorphin.<sup>265-267</sup> Pertussis toxin blocks the effects of morphine and  $\beta$ -endorphin, confirming the role of G proteins in transduction after receptor activation.<sup>155</sup>

Intrathecal morphine also has analgesic effects in prolonged models of nociception, such as experimental arthritis<sup>268</sup> and intraplantar formalin.<sup>269</sup> However, intrathecal morphine is less effective in animal models of chronic neuropathic pain. For example, morphine had no effect on the onset of thermal hyperalgesia in sciatic experimental peripheral neuropathy.<sup>270</sup> Relief of neuro-

pathic pain in rats has been observed only when morphine is coadministered with other compounds.<sup>271</sup>

Although intrathecal  $\delta$ - and  $\kappa$ -opioid receptor agonists decreased the response to short-term noxious thermal stimuli,<sup>264</sup> these usually produce antinociception only in specific models of acute pain in animals. For example,  $\delta$ -agonists produced marked analgesia in the colorectal distension and intraplantar formalin models,<sup>272,262</sup> whereas  $\kappa$ -agonists had only marginal effects.<sup>262</sup> Conversely,  $\kappa$ -agonists markedly reduced arthritis-induced pressure pain, whereas  $\delta$ -agonists were ineffective.<sup>268</sup> Toxicity has not been reported after intrathecal enkephalin, but the  $\kappa$ -agonist dynorphin produced hindlimb paralysis in some studies.<sup>273,274</sup> A long-lasting tactile allodynia has also been reported after intrathecal dynorphin.<sup>275</sup> Interestingly, NMDA-receptor antagonists prevented dynorphin-induced paralysis and allodynia. This suggests not only that dynorphin may be neurotoxic when administered in the intrathecal space, but also that there are important functional interactions between dynorphin and the excitatory amino acids that contribute to this toxicity.

Intraspinal delivery of opioids for pain management in humans is relatively new; nevertheless, morphine is the gold standard for intrathecal analgesics.<sup>276</sup> Epidural and intrathecal opiates usually produce excellent analgesia,<sup>277,278</sup> and infusion pumps have been developed to provide continuous delivery of spinal opioids in patients with chronic pain. Intrathecal morphine has fewer side effects than do systemic opioids.<sup>279-286</sup> Only minor neurohistopathologic changes, including focal foreign body giant cells and small aggregates of lymphocytes and reactive microglia near the catheter site, have been observed after long-term infusion of morphine to cancer patients.<sup>287</sup> Nevertheless, complications are common, most notably, pruritis, respiratory depression, somnolence, and gastrointestinal and urinary dysfunction.<sup>279-285,288</sup> Additionally, development of tolerance often necessitates continued escalation of dose until the capacity of current infusion pumps is exceeded. Furthermore, some authors reported that continuous morphine infusion is ineffective for long-term management of chronic pain from nonmalignant causes<sup>289</sup> and that accumulation of morphine metabolites provokes development of a paradoxical hyperalgesia, allodynia and myoclonus.<sup>290</sup>

Other opioids have also been tested as intrathecal analgesics. Lipophilic agents, such as fentanyl, dilaudid, and sufentanil, that diffuse poorly in cerebrospinal fluid may have a role in well-localized pain syndromes when delivered by catheters to spinal levels corresponding to

the affected areas.  $\delta$ -Opioid and  $\kappa$ -opioid receptor agonists may be useful in pain syndromes that are little affected by  $\mu$ -agonists such as morphine. Intrathecal  $\beta$ -endorphin produced postsurgical analgesia<sup>291</sup> and relief of intractable pain caused by disseminated cancer.<sup>292,293</sup> Intrathecal dynorphin produced analgesia for cancer pain patients without obvious toxicity.<sup>294</sup> Therefore, future studies with opioids will probably focus on improving effectiveness for neuropathic-related pains, perhaps with a focus on the usefulness of  $\delta$ - and  $\kappa$ -agonists in these conditions, and to limit unwanted effects, such as tolerance.

**Neurokinin Receptors.** The neurokinin peptides include substance P and neurokinins A and B.<sup>295-297</sup> Substance P and neurokinin A are involved in transmission and modulation of nociceptive inputs, whereas a role for neurokinin B is poorly defined. Neurokinin peptides are located in primary afferents, dorsal roots, and cells and axon terminals in the spinal cord. The majority of neurokinin-containing terminals are from primary afferent fibers, whereas the remainders are from axons descending from various brain stem nuclei.<sup>2</sup>

There are at least three neurokinin receptors (1, 2, and 3) expressed in the dorsal horn<sup>295</sup> and on dorsal root ganglion neurons.<sup>298</sup> Although each peptide binds to all three receptors, substance P binds preferentially to the neurokinin-1 receptor, whereas neurokinin A and neurokinin B prefer type 2 and type 3 receptors, respectively. Neurokinin-1, and perhaps neurokinin-2, receptors are important in transmission of short-term nociceptive stimuli and induction of hypersensitivity after peripheral injury.<sup>127,299-303</sup> The transduction mechanisms of neurokinin-1 and -2 receptors involve metabolism of phosphatidyl inositol and increases of intracellular calcium levels.<sup>2</sup>

Evidence for substance P as a transmitter for nociceptive afferents was initially based on its excitation of nociceptive neurons in the dorsal horn of experimental animals in the late 1970s.<sup>304,305</sup> Subsequently, intrathecal administration of substance P was shown to produce a "caudally directed biting and scratching syndrome," presumed to reflect nocifensive behavior.<sup>306-308</sup> Smaller intrathecal doses of substance P reduced thresholds to noxious heat stimuli.<sup>306-308</sup> The tachykinin peptides produce small but prolonged depolarizations of many dorsal horn neurons *in vitro*<sup>309-311</sup> and excite many nociceptive dorsal horn cells *in vivo*.<sup>304,305,312-316</sup> Tachykinin receptor antagonists decrease nociceptive responses in behavioral paradigms<sup>317-321</sup> and the responses of dorsal horn

neurons to noxious stimuli.<sup>301,315,322,323</sup> Finally, animals with bioengineered disruptions of the *tachykinin-1* gene, the source of substance P and neurokinin A, have increased baseline nociceptive thresholds and decreased responses to formalin and capsaicin,<sup>324,325</sup> whereas animals with bioengineered alterations of the neurokinin-1 receptor showed decreased 'wind-up'.<sup>326</sup> Interestingly, animals given intrathecal injections of neurokinin-1 receptor antisense oligonucleotide did not show a decrease in receptor level or change in behavioral responses to formalin until also treated with intrathecal substance P.<sup>327</sup>

Human studies with intrathecal neurokinin receptor antagonists have not been reported, possibly because of the potential toxicity and rapid degradation of the peptide analog antagonists that were available. Newer non-peptide antagonists have alleviated these previous concerns, and clinical trials for relief of depression<sup>328</sup> and postoperative pain have begun for orally active antagonists.<sup>329</sup> Intrathecal studies should follow soon.

**Calcitonin Gene-related Peptide Receptors.** Calcitonin gene-related peptide is found in many small dorsal root ganglion cells, in thinly myelinated (A- $\delta$ ) and unmyelinated (C) axons, in axons of Lissauer's tract, and in terminals of these primary afferents in spinal laminae I, II, and V.<sup>330</sup> Although two types of calcitonin gene-related peptide,  $\alpha$  and  $\beta$ , are present in dorsal root ganglion cells and as many as four types of G-protein-coupled receptors are present in the dorsal horn, the function of this neuropeptide is unknown.<sup>330,331</sup> The coexistence of calcitonin gene-related peptide and substance P within spinal cord terminals<sup>332,333</sup> and dorsal root ganglion neurons<sup>334</sup> suggests a functional relation between the two. The levels of calcitonin gene-related peptide in the dorsal horn change in parallel with those of substance P after acute knee joint inflammation<sup>335</sup> and after injury to peripheral nerve.<sup>336</sup> Noxious thermal, mechanical, and chemical stimuli provoke the corelease of calcitonin gene-related peptide with substance P in the substantia gelatinosa.<sup>332,337,338</sup> However, intrathecal administration of calcitonin gene-related peptide has mixed effects in models of nociception. Calcitonin gene-related peptide had no effect on nociceptive reflexes in one series of studies<sup>333,339</sup> but facilitated tail-flick reflex in another series.<sup>340</sup> Similarly, calcitonin gene-related peptide antagonized the effects of substance P in one series<sup>341</sup> but enhanced the effects of substance P by preventing degradation or increasing peptide release in others.<sup>333,342</sup> The effects of intrathecal injection of calcitonin gene-related peptide<sup>8-37</sup>, a receptor antagonist,

have been clearer. This compound produced a dose-dependent increase in paw-withdrawal latency of normal rats to paw pressure and radiant heat.<sup>339</sup> Additionally, calcitonin gene-related peptide<sub>8-37</sub> reversed hyperalgesia produced by thermal<sup>343</sup> and nerve injury.<sup>344</sup> These effects were suggested to be a result of antagonism at endogenous opioid receptors.<sup>344,345</sup> In summary, the role of calcitonin gene-related peptide in dorsal horn somatosensory processing necessitates further definition before its usefulness for treatment of human pain can be evaluated.

**Somatostatin Receptors.** Terenius<sup>346</sup> first suggested an antinociceptive role for somatostatin in the spinal cord. Somatostatin is detected in primary afferent axons terminating in the dorsal horn, spinal interneurons, and terminals of axons from descending pathways.<sup>347</sup> There are at least five distinct somatostatin receptors, designated by numbers 1-5, encoded by separate genes.<sup>348</sup> This may be an underestimate, however, because subtypes of the somatostatin-2 receptor (A and B) have been identified. All receptors identified to date are G-protein coupled and widely expressed throughout the central nervous system.<sup>348</sup> Somatostatin is specifically increased in the dorsal horn after noxious thermal but not after noxious mechanical stimulation.<sup>349,350</sup> Similarly, intrathecal injection of somatostatin, or somatostatin analogs, produced analgesia to thermal but not mechanical stimuli.<sup>351-357</sup> Evidence of neurotoxicity, including gait disturbance, paralysis, pyknotic dorsal horn neurons, and posterior column demyelination, are common after intrathecal somatostatin in cats and rats.<sup>358-360</sup>

Despite the neurotoxicity observed in animals, two clinical trials with intrathecal somatostatin have been conducted in cancer patients<sup>361,362</sup> In the first study, six of eight patients had good-to-excellent pain relief, although tachyphylaxis or short-term tolerance after a short period of infusion necessitated increased dosing. Postmortem observations revealed histopathologic changes in two of eight patients.<sup>361</sup> Although these changes were attributed to progression of disease, a direct neurotoxic effect of somatostatin cannot be discounted because of the animal data.<sup>358</sup> Another similar study used octreotide, a synthetic analogue of somatostatin, because of its longer half-life and lack of associated neurodegenerative effects.<sup>362</sup> Two patients with nonmalignant pain were treated successfully with continuous intrathecal infusion of octreotide for 5 yr, although additional opioids were necessary. When blinded to the drug, each patient preferred octreotide to placebo.<sup>362</sup> Thus, although a number of factors limit the use of

somatostatin, derivatives of this peptide may ultimately have clinical usefulness.

**Other Neuromodulators.** A large number of neuropeptides and neuropeptide receptors have been identified in the dorsal horn of animals and humans for which a clear role in nociceptive processing has yet to be established. Neuropeptide Y, for example, is colocalized in GABA-containing cells of the dorsal horn.<sup>363</sup> The peptide and its receptors concentrate in the superficial layers of the dorsal horn, where afferent information is modulated,<sup>364</sup> and neuropeptide Y decreases transmitter release from primary afferent fibers.<sup>365</sup> Galanin and its binding sites also concentrate in the superficial layers of the dorsal horn.<sup>366</sup> Galanin antagonizes many effects of substance P and calcitonin gene-related peptide.<sup>341,367</sup> The levels of neuropeptide Y and galanin substantially increase after peripheral nerve injury.<sup>368</sup>

Other neuropeptides and neuropeptide receptors found in the dorsal horn include angiotensin II,<sup>369,370</sup> bombesin,<sup>371</sup> corticotropin releasing hormone,<sup>370</sup> vasopressin, oxytocin,<sup>372</sup> vasoactive intestinal polypeptide,<sup>373</sup> and cholecystokinin. Of this group, bombesin produces a caudally directed biting and scratching behavior similar to that of substance P after intrathecal injection<sup>374</sup>; vasoactive intestinal polypeptide is directly excitatory to dorsal horn neurons<sup>375</sup>; and cholecystokinin may act as a natural opiate-receptor antagonist.

In summary, there are many peptides in the dorsal horn for which function is poorly defined. However, it appears that several of these limit the signaling of nociceptive information, whereas others promote this signaling. Eventually, agonists for some, such as neuropeptide Y and galanin, and antagonists for others, such as bombesin and vasoactive intestinal polypeptide, may prove useful for the clinical treatment of pain.

**Modulation of Trans-synaptic Signal Molecules.** The trans-synaptic signal molecules are the newest class of substances to be identified. Similar to neuromodulators, these substances have relatively slow onset and a prolonged duration of effect. In addition, these substances often have effects that are remote from their site of release. The trans-synaptic molecules differ from neuromodulators, however, in that they do not necessarily have either a discrete neuronal locus for release or a specific neuronal target site of action, but rather may also have non-neuronal (glial) sites of release and effect.<sup>376-379</sup> Members of this family include the prostaglandins, leukotrienes, nitric oxide, and carbon monoxide.

**Prostaglandins and Leukotrienes.** Prostaglandins and leukotrienes are synthesized from arachidonic acid by the fatty acid cyclooxygenase and lipoxygenase pathways.<sup>380</sup> Prostaglandins and leukotrienes both have important roles in the sensitization of peripheral primary afferent fibers<sup>381-383</sup> and the generation of primary hyperalgesia.<sup>384</sup> It is the prostaglandins, however, that play the more important role in dorsal horn (central) mechanisms of pain transmission.<sup>385</sup> Influx of calcium to neurons and glia through NMDA and voltage-gated ion channels activated by nociceptive inputs activates phospholipase A<sub>2</sub> and releases arachidonic acid.<sup>379,386,387</sup> Arachidonic acid is then metabolized in the central nervous system by the enzyme cyclooxygenase type 2 and in peripheral tissues by cyclooxygenase type 1 to form prostaglandins.<sup>378,385</sup> Effects of prostaglandins on pain transmission are mediated by increases in neuronal levels of calcium and cAMP,<sup>386</sup> thereby increasing excitability and the release of excitatory neurotransmitters and neuromodulators.<sup>388,389</sup>

Effectiveness of intraspinal cyclooxygenase inhibitors has been evaluated in two animal models of sustained pain.<sup>390-392</sup> Intrathecal ketorolac, aspirin, and indomethacin had limited effects on the short-term phase reaction to formalin, but markedly attenuated the delayed second phase.<sup>390,392</sup> Interestingly, ketorolac produced a synergistic antinociceptive effect with morphine and an  $\alpha_2$ -adrenergic agonist, suggesting complementary but unshared cellular mechanisms between these receptor systems.<sup>390</sup> Ketorolac probably decreases activation of G<sub>s</sub> by prostaglandins, whereas the opioids and  $\alpha_2$ -adrenergic agonists activate G<sub>i</sub>, resulting in inhibition of spinal adenylate cyclase.<sup>386</sup> Finally, intrathecal administration of a cyclooxygenase type 2 antagonist decreased thermal hyperalgesia after paw inflammation.<sup>391</sup> In summary, intrathecal cyclooxygenase inhibitors are effective in reducing moderate levels of pain but not completely effective against more severe pain. This reduced effectiveness compared with analgesics, such as morphine, may reflect the observation that not all prostaglandins provoke pain, but rather some prostaglandins appear to limit pain.<sup>393</sup> Future directions in prostanoid research will probably focus on the design of antagonists that selectively reduce synthesis of pain-provoking prostanoids, such as the prostaglandin E<sub>2</sub>, while sparing formation of pain-limiting prostanoids, such as prostaglandin F<sub>2</sub>.<sup>393,394</sup>

**Nitric Oxide and Carbon Monoxide.** Nitric oxide and carbon monoxide have recently been recognized as novel neurotransmitter substances.<sup>71,395-397</sup> Nitric oxide

is synthesized from L-arginine by activation of the enzyme nitric oxide synthase. Nitric oxide synthase is activated by increases in intracellular calcium after opening of NMDA receptors and neurokinin-1 receptor-mediated release of inositol triphosphate.<sup>398</sup> Free nitric oxide diffuses to nearby and distant cells, penetrates the cell membranes, and increases the function of guanylate cyclase and protein kinase G, thereby influencing gene regulation.<sup>395,396</sup> Although less studied, carbon monoxide appears to function identically to nitric oxide in many neural systems.<sup>397</sup>

The role of nitric oxide in nociceptive transmission has been tested in several animal studies. Levels of nitric oxide synthase increase in the dorsal root ganglion and dorsal horn of rats with paw inflammation and neuropathic pain.<sup>399,400</sup> Nitric oxide is involved in the development of wind-up and several models of hyperalgesia.<sup>78,399,401-403</sup> Intrathecal administration of arginine analogs, which inhibit nitric oxide synthesis as false substrates, produced a dose-dependent reduction in hyperalgesia as a result of intraplantar formalin and nerve injury.<sup>401-403</sup> Recently, a possible role of carbon monoxide in nociceptive transmission was evaluated. Intrathecal zinc protoporphyrin IX, which binds and neutralizes carbon monoxide, produced a blockade of spinal nociceptive transmission.<sup>404</sup> Thus, both substances may have future roles in the management of pain. However, no clinical trials have assessed the analgesic or potential neurotoxic effects<sup>395,397</sup> of nitric oxide or carbon monoxide inhibitors.

## Future Methods of Drug Delivery

Many of the compounds reviewed herein may have more widespread clinical use in the near future. Further on the treatment horizon will be the introduction of novel drug delivery strategies. For example, analgesics encapsulated in liposomes for prolongation of pharmacologic effects will become available. Two compounds, tetracaine and meperidine, produce prolonged analgesia in the mouse after liposome encapsulation.<sup>405,406</sup> Initial attempts have been made to develop slowly degradable polymers that contain local anesthetics or opioids to provide prolonged, sustained release of analgesics.<sup>407</sup> For example, epidurally implanted biodegradable polymers that contain local anesthetics yielded an 8- to 10-fold increase in duration of neural blockade.<sup>408</sup> Similarly, a hydromorphone-containing polymer delivered a constant amount of drug over 30-90 days both *in vitro* and



## THE FUTURE OF INTRATHECAL ANALGESIA

in animal models, without an early drug spike.<sup>409</sup> Although these preparations have not been studied extensively with intrathecal administration, the implications are obvious.

Still further on the horizon looms the possibility of long-term pain relief using intrathecal cell implantation. Antinociceptive effects were produced in rats by intrathecal transplantation of catecholamine-producing B16 melanoma cells.<sup>410</sup> Analgesia has also been produced by intrathecal transplantation of adrenal medullary chromaffin cells that secrete opioid peptides and catecholamines<sup>411</sup>.

### Conclusion

We are entering an exciting era in the therapy of chronic pain conditions as basic science provides many new intrathecal compounds and drug delivery systems to meet the needs of clinical practice. The only compound approved by the Food and Drug Administration for long-term intrathecal treatment of pain is morphine. All other compounds that we discussed are experimental, and issues regarding long-term toxicity and drug interactions are not resolved. Nevertheless, it is likely that many new compounds and treatment approaches will ultimately have a clinical niche and, as a consequence, alter and improve the treatment of chronic pain.

### References

- Staats PS, Mitchell VD: Future directions for intrathecal therapies. *Prog Anesthesiol* 1997; 19:367-82
- Rustioni A, Weinberg RJ: Somatosensory system, *Handbook of Chemical Neuroanatomy, Integrated Systems of the CNS, Part II*. Edited by Bjorklund A, Hokfelt T, Swanson LW. Amsterdam, Elsevier Science Publishers, 1989, pp 219-321
- Paice JA, Renn RD, Shott SD: Intraspinal morphine for chronic pain: A retrospective multicenter study. *J Pain Symptom Manag* 1996; 11:71-80
- Rush AM, Brau ME, Elliott AA, Elliott JR: Electrophysiological properties of sodium current subtypes in small cells from adult rat dorsal root ganglia. *J Physiol* 1998; 511:771-89
- Safronov BV, Wolff M, Vogel W: Functional distribution of three types of Na<sup>+</sup> channel on soma and processes of dorsal horn neurones of rat spinal cord. *J Physiol* 1997; 503:371-85
- Young ER, MacKenzie TA: The pharmacology of local anesthetics—A review of the literature. *J Can Dent Assoc* 1992; 58:34-42
- Feldman HS, Covino BG: A chronic model for investigation of experimental spinal anesthesia in the dog. *ANESTHESIOLOGY* 1981; 54: 148-52
- Maves TJ, Gebhart GF: Antinociceptive synergy between intrathecal morphine and lidocaine during visceral and somatic nociception in the rat. *ANESTHESIOLOGY* 1992; 76:91-9
- Chaplan SR, Bach FW, Shafer SL, Yaksh TL: Prolonged alleviation of tactile allodynia by intravenous lidocaine in neuropathic rats. *ANESTHESIOLOGY* 1995; 83:775-85
- Luo L, Wiesenfeld-Hallin Z: Effects of intrathecal local anesthetics on spinal excitability and on the development of autotomy. *Pain* 1995; 63:173-9
- Ossipov MH, Suarez LJ, Spaulding TC: A comparison of the antinociceptive and behavioral effects of intrathecally administered opiates, alpha-2-adrenergic agonists, and local anesthetics in mice and rats. *Anesth Analg* 1988; 67:616-24
- Yashpal K, Katz J, Coderre TJ: Effects of preemptive or postinjury intrathecal local anesthesia on persistent nociceptive responses in rats. Confounding influences of peripheral inflammation and the general anesthetic regimen. *ANESTHESIOLOGY* 1996; 84:1119-25
- Dahm P, Nitescu P, Appelgren L, Curelaru I: Efficacy and technical complications of long-term continuous intraspinal infusions of opioid and/or bupivacaine in refractory nonmalignant pain: A comparison between the epidural and the intrathecal approach with externalized or implanted catheters and infusion pumps. *Clin J Pain* 1998; 14:4-16
- Lubenow TR, Faber LP, McCarthy RJ, Hopkins EM, Warren WH, Ivankovich AD: Postthoracotomy pain management using continuous epidural analgesia in 1,324 patients. *Ann Thoracic Surg* 1994; 58: 924-30
- Shafer AL, Donnelly AJ: Management of postoperative pain by continuous epidural infusion of analgesics. *Clin Pharmacol* 1991; 10: 745-64
- Rapp SE, Ready LB, Greer BE: Postoperative pain management in gynecology oncology patients utilizing epidural opiate analgesia and patient-controlled analgesia. *Gynecol Oncol* 1989; 35:341-4
- Hardy PAJ, Wells JCD: Continuous intrathecal lignocaine infusion analgesia: A case report of a nine-week trial. *Palliat Med* 1989; 3:23-5
- Berde CB, Sethna NF, Conrad LS, Hershenson MB, Shillito J: Subarachnoid bupivacaine analgesia for seven months for a patient with a spinal cord tumor. *ANESTHESIOLOGY* 1990; 72:1094-6
- Sjoberg M, Appelgren L, Einarsson S, Hultman E, Linder LE, Nitescu P, Curelaru I: Long-term intrathecal morphine and bupivacaine in refractory cancer pain: I. Results from the first series of 52 patients. *Acta Anaesth Scand* 1991; 35:30-43
- Appelgren L, Janson M, Nitescu P, Curelaru I: Continuous intracisternal and high cervical intrathecal bupivacaine analgesia in refractory head and neck pain. *ANESTHESIOLOGY* 1996; 84:256-72
- Krames ES, Lanning RM: Intrathecal infusional analgesia for nonmalignant pain: Analgesic efficacy of intrathecal opioid with or without bupivacaine. *J Pain Symptom Manag* 1993; 8:539-48
- Kowal A, Staats PS: Intractable Pain: A new technique for attack in patients with an implanted intrathecal infusion pump. *Regional Anesthesia* 1997; 22:584
- Arbuckle JB, Docherty RJ: Expression of tetrodotoxin-resistant sodium channel in capsaicin-sensitive dorsal root ganglion neurons of adult rats. *Neurosci Lett* 1995; 185:70-3
- Akopian AJ, Silvilati L, Wood JN: A tetrodotoxin-resistant voltage gated channel expressed by sensory neurons. *Nature* 1996; 379: 25-28
- Dib-Hajj SD, Tyrrell L, Black JA, Waxman SG: Na<sup>v</sup>1, a novel voltage-gated Na channel, is expressed preferentially in peripheral sensory neurons and down-regulated after axotomy. *Proc Natl Acad Sci U S A* 1998; 95:8963-8
- Sangameswaran L, Fish LM, Koch BD, Rabert DK, Delgado SG,

Ilnicka M, Jakeman LB, Novakovic S, Wong K, Sze P, Tzoumaka E, Stewart GR, Herman RC, Chan H, Eglén RM, Hunter JC: A novel tetrodotoxin-sensitive, voltage-gated sodium channel expressed in rat and human dorsal root ganglia. *J Biol Chem* 1998; 272:14805-9

27. Souslova VA, Fox M, Wood JN, Akopian AN: Cloning and characterization of a mouse sensory neuron tetrodotoxin-resistant voltage-gated sodium channel gene, SCN10a. *Genomics* 1997; 41:201-9

28. Gold MS, Levine JD, Correa AM: Modulation of TTX-RINa by PKC and PKA and their role in PGE2-induced sensitization of rat sensory neurons in vitro. *J Neurosci* 1998; 18:10345-55

29. Gold MS, Reichling DB, Shuster MJ, Levine JD: Hyperalgesic agents increase a tetrodotoxin-resistant Na<sup>+</sup> current in nociceptors. *Proc Natl Acad Sci U S A* 1996; 93:1108-12

30. Tanaka M, Cummins TR, Ishikawa K, Dib-Hajj SD, Black JA, Waxman SG: SNS Na<sup>+</sup> channel expression increases in dorsal root ganglion neurons in the carrageenan inflammatory pain model. *Neuroreport* 1998; 9:967-72

31. Okuse K, Chaplan SR, McMahon SB, Luo ZD, Calcutt NA, Scott BP, Akopian AN, Wood JN: Regulation of expression of the sensory neuron-specific sodium channel SNS in inflammatory and neuropathic pain. *Mol Cell Neurosci* 1997; 10:196-207

32. Oaklander AL, Belzberg AJ: Unilateral nerve injury down-regulates mRNA for Na<sup>+</sup> channel SCN10A bilaterally in rat dorsal root ganglia. *Brain Res Mol Brain Res* 1997; 52:162-5

33. Novakovic SD, Tzoumaka E, McGivern JG, Haraguchi M, Sangameswaran L, Gogas KR, Eglén RM, Hunter JC: Distribution of the tetrodotoxin-resistant sodium channel PN3 in rat sensory neurons in normal and neuropathic conditions. *J Neurosci* 1998; 18:2174-87

34. Trezise DJ, John VH, Xie XM: Voltage- and use-dependent inhibition of Na<sup>+</sup> channels in rat sensory neurones by 4030W92, a new antihyperalgesic agent. *Br J Pharmacol* 1998; 124:953-63

35. Rush AM, Elliott JR: Phenytoin and carbamazepine: Differential inhibition of sodium currents in small cells from adult rat dorsal root ganglia. *Neurosci Lett* 1997; 226:95-8

36. Lynch C, Pancrazio JJ: Snails, spiders, and stereospecificity — Is there a role for calcium channels in anesthetic mechanisms? *ANESTHESIOLOGY* 1994; 81:1-5

37. Bowersox SS, Gadbois T, Singh T, Pettus M, Wang YX, Luther RR: Selective N-type neuronal voltage-sensitive calcium channel blocker, SNX-111, produces spinal antinociception in rat models of acute, persistent and neuropathic pain. *J Pharmacol Exp Ther* 1996; 279:1243-9

38. Omote K, Kawamata M, Satoh O, Iwasaki H, Namiki A: Spinal antinociceptive action of an N-type voltage-dependent calcium channel blocker and the synergistic interaction with morphine. *ANESTHESIOLOGY* 1996; 84:636-43

39. Todorovic SM, Lingle CJ: Pharmacological properties of T-type Ca<sup>2+</sup> current in adult rat sensory neurons: Effects of anticonvulsant and anesthetic agents. *J Neurophysiol* 1998; 79:240-52

40. Omote K, Sonoda H: Potentiation of antinociceptive effects of morphine by calcium-channel blockers at the level of the spinal cord. *ANESTHESIOLOGY* 1993; 79:746-52

41. Hara K, Saito Y, Kirihara Y, Sakura S, Kosaka Y: Antinociceptive effects of intrathecal L-type calcium channel blockers on visceral and somatic stimuli in the rat. *Anesth Analg* 1998; 87:382-7

42. Sluka KA: Blockade of calcium channels can prevent the onset of secondary hyperalgesia and allodynia induced by intradermal injection of capsaicin in rats. *Pain* 1997; 71:157-64

43. Malmberg AB, Yaksh TL: Voltage-sensitive calcium channels in

spinal nociceptive processing: Blockade of N- and P-type channels inhibits formalin-induced nociception. *J Neurosci* 1994; 14:4882-90

44. Sluka KA: Blockade of N- and P/Q-type calcium channels reduces the secondary heat hyperalgesia induced by acute inflammation. *J Pharmacol Exp Ther* 1998; 287:232-7

45. Nebe J, Vanegas H, Neugebauer V, Schaible HG: Omega-agatoxin IVA, a P-type calcium channel antagonist, reduces nociceptive processing in spinal cord neurons with input from the inflamed but not the normal knee joint—an electrophysiological study in the rat in vivo. *Eur J Neurosci* 1997; 9:2193-201

46. Choe H, Kim JS, Ko SH, Kim DC, Han YJ, Song HS: Epidural verapamil reduces analgesic consumption after lower abdominal surgery. *Anesth Analg* 1998; 86:786-90

47. Brose WG, Cherukuri S, Longton WC, Gaeta RR, Presley R: Safety and efficacy of intrathecal SNX-111, a novel analgesic, in the management of intractable neuropathic and nociceptive pain in humans: Preliminary results. *Am Pain Soc Abstracts* 1995; A-116

48. Jan LY, Jan YN: Structural elements involved in specific K<sup>+</sup> channel functions. *Ann Rev Physiol* 1992; 54:537-5

49. Cooper JR, Bloom FE, Roth RH: The biochemical basis of neuropharmacology. New York, Oxford University Press, 1991.

50. Safronov BV, Bischoff U, Vogel W: Single voltage-gated K<sup>+</sup> channels and their functions in small dorsal root ganglion neurones of rat. *J Physiol* 1996; 493:408

51. Gold MS, Shuster MJ, Levine JD: Characterization of six voltage-gated K<sup>+</sup> currents in adult rat sensory neurons. *J Neurophysiol* 1996; 75:2629-46

52. Shi R, Blight AR: Differential effects of low and high concentrations of 4-aminopyridine on axonal conduction in normal and injured spinal cord. *Neuroscience* 1997; 77:553-62

53. Schwid SR, Petrie MD, McDermott MP, Tierney DS, Mason DH, Goodman AD: Quantitative assessment of sustained-release 4-aminopyridine for symptomatic treatment of multiple sclerosis. *Neurology* 1997; 48:817-21

54. Bowe CM, Kocsis JD, Targ EF, Waxman SG: Physiological effects of 4-aminopyridine on demyelinated mammalian motor and sensory fibers. *Ann Neurol* 1987; 22:264-8

55. Lees G: The effects of anticonvulsants on 4-aminopyridine-induced bursting: In vitro studies on rat peripheral nerve and dorsal roots. *Br J Pharmacol* 1996; 117:573-9

56. Jentsch TJ, Gunther W: Chloride channels: An emerging molecular picture. *BioEssays* 1997; 19:117-26

57. Grenningloh G, Rienitz A, Schmitt B, Methfessel C, Zensen M, Beyreuther K, Gundelfinger ED, Betz H: The strychnine-binding subunit of the glycine receptor shows homology with nicotinic acetylcholine receptors. *Nature* 1987; 328:215-20

58. Jentsch TJ, Günther W, Püsch M, Schwappach B: Properties of voltage-gated chloride channels of the CLC gene family. *J Physiol* 1995; 482:19S-25S

59. Riordan JR, Rommens JM, Kerem B-S, Alon N, Rozmahel R, Grzelczak Z, Zielenski J, Lok S, Plavsic N, Chou J-L, Drumm ML, Iannuzzi C, Collins FS, Tsui LC: Identification of the cystic fibrosis gene: Cloning and characterization of complementary DNA. *Science* 1989; 245:1066-73

60. Schmidt RF, Senges J, Zimmermann M: Presynaptic depolarization of cutaneous mechanoreceptor afferents after mechanical skin stimulation. *Exp Brain Res* 1967; 3:234-47

61. Eccles JC, Schmidt RF, Willis WD: The location and the mode

## THE FUTURE OF INTRATHECAL ANALGESIA

of action of the presynaptic inhibitory pathways on to group I afferent fibers from muscle. *J Neurophysiol* 1963; 26:506-22

62. Yaksh TL: Behavioral and autonomic correlates of the tactile evoked allodynia produced by spinal glycine inhibition: effects of modulatory receptor systems and excitatory amino acid antagonists. *Pain* 1989; 37:111-23

63. Sherman SE, Loomis CW: Morphine insensitive allodynia is produced by intrathecal strychnine in the lightly anesthetized rat. *Pain* 1994; 56:17-29

64. Sivilotti L, Woolf CJ: The contribution of GABAA and glycine receptors to central sensitization: Disinhibition and touch-evoked allodynia in the spinal cord. *J Neurophysiol* 1994; 72:169-79

65. Sugimoto T, Bennett GJ, Kajander KC: Transsynaptic degeneration in the superficial dorsal horn after sciatic nerve injury: Effects of a chronic constriction injury, transection, and strychnine. *Pain* 1990; 42:205-13

66. Cervero F, Laird JMA: Mechanisms of touch-evoked pain (allodynia): A new model. *Pain* 1996; 68:13-23

67. Melzack R, Wall PD: Pain mechanisms: A new theory. *Science* 1965; 150:971-9

68. Linden J, Auchampach JA, Jin X, Figler RA: The structure and function of A1 and A2B adenosine receptors. *Life Sci* 1998; 62:1519-24

69. Manji HK, Potter WZ, Lenox RH: Signal transduction pathways. Molecular targets for lithium's actions. *Arch Gen Psychiat* 1995; 52:531-43

70. Pacheco MA, Jope RS: Phosphoinositide signaling in human brain. *Prog Neurobiol* 1996; 50:255-73

71. Vincent SR: Nitric oxide: A radical neurotransmitter in the central nervous system. *Prog Neurobiol* 1994; 42:129-60

72. Majewski H, Kotsonis P, Iannazzo L, Murphy TV, Musgrave IF: Protein kinase C and transmitter release. *Clin Exp Pharmacol Physiol* 1997; 24:619-23

73. Berthele A, Schadrack J, Zieglgänsberger W: Involvement of glutamatergic neurotransmission and protein kinase C in spinal plasticity and the development of chronic pain. *Prog Brain Res* 1996; 110:193-206

74. Mayer DJ, Mao J, Price DD: The association of neuropathic pain, morphine tolerance and dependence, and the translocation of protein kinase C. *NIDA Research Monograph* 1995; 147:269-98

75. Yashpal K, Pitcher GM, Parent A, Quirion R,Coderre TJ: Noxious thermal and chemical stimulation induce increases in 3H-phorbol 12,13-dibutyrate binding in spinal cord dorsal horn as well as persistent pain and hyperalgesia, which is reduced by inhibition of protein kinase C. *J Neurosci* 1995; 15:3263-72

76. Coderre TJ: Contribution of protein kinase C to central sensitization and persistent pain following tissue injury. *Neurosci Lett* 1998; 140:181-4

77. Palecek J, Paleckova V, Dougherty PM, Willis WD: The effect of phorbol esters on the responses of primate spinothalamic neurons to mechanical and thermal stimuli. *J Neurophysiol* 1994; 71:529-37

78. Meller ST, Dykstra C, Gebhart GF: Acute thermal hyperalgesia in the rat is produced by activation of N-methyl-D-aspartate receptors and protein kinase C and production of nitric oxide. *Neuroscience* 1996; 71:327-35

79. Sluka KA, Willis WD: The effects of G-protein and protein kinase inhibitors on the behavioral responses of rats to intradermal injection of capsaicin. *Pain* 1997; 71:165-78

80. Meller ST: Thermal and mechanical hyperalgesia. A distinct

role for different excitatory amino acid receptors and signal transduction pathways? *Am Pain Soc J* 1998; 3:215-31

81. Malmberg AB, Chen C, Tonegawa S, Basbaum AI: Preserved acute pain and reduced neuropathic pain in mice lacking PKC gamma. *Science* 1997; 278:279-83

82. Malmberg AB, Brandon EP, Idzera RL, Liu H, McKnight GS, Basbaum AI: Diminished inflammation and nociceptive pain with preservation of neuropathic pain in mice with a targeted mutation of the type I regulatory subunit of cAMP-dependent protein kinase. *J Neurosci* 1997; 17:7462-70

83. Duggan AW, Grierson BT: Methyl xanthines, adenosine 3',5'-cyclic monophosphate and the spinal transmission of nociceptive information. *Br J Pharmacol* 1979; 67:51-7

84. Graham LT Jr, Shank RP, Werman R, Aprison MH: Distribution of some synaptic transmitter suspects in cat spinal cord: Glutamic acid, aspartic acid, gamma-aminobutyric acid, glycine and glutamine. *J Neurochem* 1967; 14:465-72

85. Westlund KN, McNeill DL, Coggeshall RE: Glutamate immunoreactivity in rat dorsal root axons. *Neurosci Lett* 1989; 96:13-7

86. Westlund KN, McNeil DL, Patterson JT, Coggeshall RE: Aspartate immunoreactive axons in normal rat L4 dorsal roots. *Brain Res* 1989; 489:347-51

87. Carlton SM, LaMotte CC, Honda CN, Surmeier DJ, Delanerolle N, Willis WD: Ultrastructural analysis of terminals contacting functionally identified primate spinothalamic tract neurons. *J Comp Neurol* 1989; 281:555-66

88. Monaghan DT, Bridges RJ, Cotman CW: The excitatory amino acid receptors: Their classes, pharmacology, and distinct properties in the function of the central nervous system. *Ann Rev Pharmacol Toxicol* 1989; 29:365-402

89. Mayer ML, Westbrook GL: The physiology of excitatory amino acids in the vertebrate central nervous system. *Prog Neurobiol* 1987; 28:197-276

90. Cotman CW, Monaghan DT: Excitatory amino acid neurotransmission: NMDA receptors and Hebb-type synaptic plasticity. *Ann Rev Neurosci* 1988; 11:61-80

91. Davies J, Watkins JC: Actions of D and L forms of 2-amino-5-phosphonovalerate and 2-amino-4-phosphonobutyrate in the cat spinal cord. *Brain Res* 1982; 235:378-86

92. Davies J: A reappraisal of the role of NMDA and non-NMDA receptors in neurotransmission in the cat dorsal horn. *Frontiers in Excitatory Amino Acid Research*. Edited by Cavalhorne EA, Lehman J, Turski L. New York, Alan R. Liss, 1988, pp 355-62

93. Dougherty PM, Palecek J, Paleckova V, Sorkin LS, Willis WD: The role of NMDA and non-NMDA excitatory amino acid receptors in the excitation of primate spinothalamic tract neurons by mechanical, thermal, chemical, and electrical stimuli. *J Neurosci* 1992; 12:3025-41

94. Hollmann M, Hartley M, Heinemann S: Ca<sup>++</sup> permeability of KA-AMPA-gated glutamate receptor channels depends on subunit composition. *Science* 1991; 252:851-3

95. Pellegrini-Giampietro DE, Gorter JA, Bennett MVL, Zukin RS: The GluR2 (GluR-B) hypothesis: Ca<sup>2+</sup>-permeable AMPA receptors in neurological disorders. *Trends Neurosci* 1997; 20:464-70

96. Partin KM, Patneau DK, Winters CA, Mayer ML, Buonanno A: Selective modulation of desensitization at AMPA versus kainate receptors by cyclothiazide and concanavalin A. *Neuron* 1993; 11:1069-82

97. Dougherty PM, Mittman S, Lenz FA: Facilitation of responses to AMPA but not kainate by cyclothiazide in primate somatosensory thalamus. *Neurosci Lett* 1998; 245:1-4

98. Aanonsen LM, Wilcox GL: Nociceptive action of excitatory amino acids in the mouse: Effects of spinally administered opioids, phencyclidine and sigma agonists. *J Pharmacol Exp Therap* 1987; 243:9-19
99. Fisher K, Coderre TJ: The contribution of metabotropic receptors (mGluRs) to formalin-induced nociception. *Pain* 1996; 68:255-63
100. Chapman V, Dickenson AH: The combination of NMDA antagonists and morphine produces profound antinociception in the rat dorsal horn. *Brain Res* 1992; 573:321-3
101. Ma QP, Woolf CJ: Noxious stimuli induce an N-methyl-D-aspartate receptor dependent hypersensitivity of the flexion withdrawal reflex to touch: Implications for the treatment of mechanical allodynia. *Pain* 1995; 61:383-90
102. Yamamoto T, Yaksh TL: Spinal pharmacology of thermal hyperesthesia induced by constriction injury of sciatic nerve. Excitatory amino acids. *Pain* 1992; 51:121-8
103. Lufty K, Cai SX, Woodward RM, Weber E: Antinociceptive effects of NMDA and non-NMDA receptor antagonists in the tail flick test in mice. *Pain* 1997; 70:31-40
104. Chanimov M, Cohen ML, Grinspun Y, Herbert M, Reif R, Kaufman I, Bahar M: Neurotoxicity after spinal anaesthesia induced by serial intrathecal injections of magnesium sulphate. An experimental study in a rat model. *Anaesthesia* 1997; 52:223-8
105. Nishiyama T, Yaksh TL, Weber E: Effects of intrathecal NMDA and non-NMDA antagonists on acute thermal nociception and their interaction with morphine. *ANESTHESIOLOGY* 1998; 89:715-22
106. Zahn PK, Umali E, Brennan TJ: Intrathecal non-NMDA excitatory amino acid receptor antagonists inhibit pain behaviors in a rat model of postoperative pain. *Pain* 1998; 74:213-23
107. Zahn PK, Brennan TJ: Intrathecal metabotropic glutamate receptor antagonists do not decrease mechanical hyperalgesia in a rat model of postoperative pain. *Anesth Analg* 1998; 87:1354-9
108. Young MR, Blackburn-Munro G, Dickinson T, Johnson MJ, Anderson H, Nakalembe I, Fleetwood-Walker SM: Antisense ablation of type I metabotropic glutamate receptor mGluR1 inhibits spinal nociceptive transmission. *J Neurosci* 1998; 18:10180-8
109. Aanonsen LM, Lei S, Wilcox GL: Excitatory amino acid receptors and nociceptive neurotransmission in rat spinal cord. *Pain* 1990; 41:309-21
110. Curtis DR, Hosli L, Johnston GAR, Johnston IH: The hyperpolarization of spinal motoneurons by glycine and related amino acids. *Exp Brain Res* 1968; 5:235-58
111. Willcockson WS, Chung JM, Hori Y, Lee KH, Willis WD: Effects of iontophoretically released amino acids and amines on primate spinothalamic tract cells. *J Neurosci* 1984; 4:732-40
112. Schneider SP, Perl ER: Selective excitation of neurons in the mammalian spinal dorsal horn by aspartate and glutamate in vitro: Correlation with location and excitatory input. *Brain Res* 1985; 360:339-43
113. King AE, Thompson SWN, Urban L, Woolf CJ: An intracellular analysis of amino acid induced excitations of deep dorsal horn neurons in the rat spinal cord slice. *Neurosci Lett* 1988; 89:286-92
114. Dougherty PM, Willis WD: Modification of the responses of spinothalamic tract neurons to mechanical stimulation by excitatory amino acids and an antagonist. *Brain Res* 1991; 542:15-22
115. Dougherty PM, Sluka KA, Sorkin LS, Westlund KN, Willis WD: Neural changes in acute arthritis in monkeys: I. Parallel enhancement of spinothalamic tract neurons to mechanical stimulation and excitatory amino acids. *Brain Res Rev* 1992; 17:1-13
116. Dougherty PM, Willis WD: Enhanced responses of spinothalamic tract neurons to excitatory amino acids accompany the generation of capsaicin-induced hyperalgesia in the monkey. *J Neurosci* 1992; 12:883-94
117. Salt TE, Hill RG: Pharmacological differentiation between responses of rat medullary dorsal horn neurons to noxious mechanical and noxious thermal cutaneous stimuli. *Brain Res* 1983; 263:167-71
118. Schouenborg J, Sjolund BH: First-order nociceptive synapses in rat dorsal horn are blocked by an amino acid antagonist. *Brain Res* 1986; 379:394-8
119. Davies SN, Lodge D: Evidence for involvement of N-methylaspartate receptors in 'wind-up' of class 2 neurones in the dorsal horn of the rat. *Brain Res* 1987; 424:402-6
120. Childs AM, Evans RH, Watkins JC: The pharmacological selectivity of three NMDA antagonists. *Eur J Pharmacol* 1988; 145:81-6
121. Dickenson AH, Sullivan AF: Differential effects of excitatory amino acid antagonists on dorsal horn nociceptive neurones in the rat. *Brain Res* 1990; 506:31-9
122. Gerber G, Randic M: Excitatory amino acid-mediated components of synaptically evoked input from dorsal roots to deep dorsal horn neurons in the rat spinal cord slice. *Neurosci Lett* 1989; 106:211-9
123. Haley JE, Sullivan AF, Dickenson AH: Evidence for spinal N-methyl-D-aspartate receptor involvement in prolonged chemical nociception in the rat. *Brain Res* 1990; 518:218-26
124. Headley PM, Parsons CG, West DC: The role of N-methylaspartate receptors in mediating responses of rat and cat spinal neurones to defined sensory stimuli. *J Physiol* 1987; 385:169-88
125. Young MR, Fleetwood-Walker SM, Dickinson T, Blackburn-Munro G, Sparrow H, Birch PJ, Bountra C: Behavioural and electrophysiological evidence supporting a role for group I metabotropic glutamate receptors in the mediation of nociceptive inputs to the rat spinal cord. *Brain Res* 1997; 777:161-9
126. Palecek J, Paleckova V, Dougherty PM, Willis WD: The effect of trans-ACPD, a metabotropic excitatory amino acid receptor agonist, on the responses of primate spinothalamic tract neurons. *Pain* 1994; 56:261-9
127. Dougherty PM, Mittman S, Sorkin LS: Hyperalgesia and amino acids. Receptor selectivity based on stimulus intensity and a role for peptides. *Am Pain Soc J* 1994; 3:240-8
128. Reich DL, Silvay G: Ketamine: an update on the first twenty-five years of clinical experience. *Can J Anaesth* 1989; 36:186-97
129. Karpinski N, Dunn J, Hansen L, Masliah E: Subpial vacuolar myelopathy after intrathecal ketamine: A report of a case. *Pain* 1997; 73:103-5
130. Hawksworth C, Serpell M: Intrathecal anesthesia with ketamine. *Reg Anesth Pain Med* 1998; 23:283-8
131. Eide PK, Stubhaug A, Oye I, Breivik H: Continuous subcutaneous administration of the N-methyl-D-aspartic acid (NMDA) receptor antagonist ketamine in the treatment of post-herpetic neuralgia. *Pain* 1995; 61:221-8
132. Nikolajsen L, Hansen CL, Nielsen J, Keller J, Arendt-Nielsen L, Jensen TS: The effect of ketamine on phantom pain: A central neuropathic disorder maintained by peripheral input. *Pain* 1996; 67:69-77
133. Andersen OK, Felsby S, Nicolaisen L, Bjerring P, Jensen TS, Arendt-Nielsen L: The effect of ketamine on stimulation of primary and secondary hyperalgesic areas induced by capsaicin - a double-blind, placebo-controlled, human experimental study. *Pain* 1996; 66:51-62

## THE FUTURE OF INTRATHECAL ANALGESIA

134. Ahuja BR: Analgesic effect of intrathecal ketamine in rats. *Br J Anaesth* 1983; 55:991-5
135. Kristensen JD, Svensson B, Gordh T Jr: The NMDA-receptor antagonist CPP abolishes neurogenic 'wind-up pain' after intrathecal administration in humans. *Pain* 1992; 51:249-53
136. Aprison MH, Shank RP, Davidoff RA: A comparison of the concentration of glycine, a transmitter suspect, in different areas of the brain and spinal cord in seven different vertebrates. *Comp Biochem Physiol* 1969; 28:1345-55
137. Rizzoli AA: Distribution of glutamic acid, aspartic acid, gamma-aminobutyric acid and glycine in six areas of cat spinal cord before and after transection. *Brain Res* 1968; 11:11-18
138. Bowery N: GABA<sub>B</sub> receptors and their significance in mammalian pharmacology. *Trends Pharmacol Sci* 1989; 10:401-6
139. Akagi H, Miledi R: Heterogeneity of glycine receptors and their messenger RNAs in rat brain and spinal cord. *Science* 1988; 242:270-3
140. Monaghan DT, Olverman HJ, Nguyen L, Watkins JC, Cotman CW: Two classes of N-methyl-D-aspartate recognition sites: Differential distribution and differential regulation by glycine. *Proc Natl Acad Sci U S A* 1988; 85:9836-40
141. Valeyev AY, Hackman JC, Wood PM, Davidoff RA: Pharmacologically novel GABA receptor in human dorsal root ganglion neurons. *J Neurophysiol* 1996; 76:3555-8
142. Johnston GAR: GABA-A receptor pharmacology. *Pharmacol Ther* 1996; 69:173-98
143. Rabow LE, Russek SJ, Farb DH: From ion currents to genomic analysis: Recent advances in GABA<sub>A</sub> receptor research. *Synapse* 1995; 21:189-274
144. Bowery NG: GABA-B receptor pharmacology. *Ann Rev Pharmacol Toxicol* 1993; 33:109-47
145. Hwang JH, Yaksh TL: The effect of spinal GABA receptor agonists on tactile allodynia in a surgically-induced neuropathic pain model in the rat. *Pain* 1997; 70:15-22
146. Beyer C, Banas C, Gonzalez-Flores O, Komisaruk BR: Blockage of substance P-induced scratching behavior in rats by the intrathecal administration of inhibitory amino acid agonists. *Pharmacol Biochem Behav* 1989; 34:491-5
147. Dirig DM, Yaksh TL: Intrathecal baclofen and muscimol, but not midazolam, are antinociceptive using the rat-formalin model. *J Pharmacol Exp Ther* 1995; 275:219-27
148. Nadeson R, Guo Z, Porter V, Gent JP, Goodchild CS: Gamma-aminobutyric acid A receptors and spinally mediated antinociception in rats. *J Pharmacol Exp Ther* 1996; 278:620-6
149. Yaksh TL, Reddy SV: Studies in the primate on the analgetic effects associated with intrathecal actions of opiates, alpha-adrenergic agonists and baclofen. *ANESTHESIOLOGY* 1981; 54:451-67
150. Edwards M, Serrao JM, Gent JP, Goodchild CS: On the mechanism by which midazolam causes spinally mediated analgesia. *ANESTHESIOLOGY* 1990; 73:273-7
151. Plummer JL, Cmielewski PL, Gourlay GK, Owen H, Cousins MJ: Antinociceptive and motor effects of intrathecal morphine combined with intrathecal clonidine, noradrenaline, carbachol or midazolam in rats. *Pain* 1992; 49:145-52
152. Aran S, Hammond DL: Antagonism of baclofen-induced antinociception by intrathecal administration of phaclofen or 2-hydroxy-saclofen, but not delta-aminovaleic acid in the rat. *J Pharmacol Exp Ther* 1991; 257:360-8
153. Hammond DL, Moy ML: Actions of 4-amino-3-(5-methoxybenz-(b)furan-2-yl) butanoic acid and 4-amino-3-benzo(b)furan-2-yl butanoic acid in the rat spinal cord. *Eur J Pharmacol* 1992; 229:227-34
154. Wilson PR, Yaksh TL: Baclofen is antinociceptive in the spinal intrathecal space of animals. *Eur J Pharmacol* 1978; 51:323-30
155. Hoehn K, Reid A, Sawynok J: Pertussis toxin inhibits antinociception produced by intrathecal injection of morphine, noradrenaline and baclofen. *Eur J Pharmacol* 1988; 146:65-72
156. Satoh O, Omote K: Roles of monoaminergic, glycinergic and GABAergic inhibitory systems in the spinal cord in rats with peripheral mononeuropathy. *Brain Res* 1996; 728:27-36
157. Simpson RK Jr, Gondo M, Robertson CS, Goodman JC: Reduction in thermal hyperalgesia by intrathecal administration of glycine and related compounds. *Neurochem Res* 1997; 22:75-9
158. Curtis DR, Hosli L, Johnston GAR, Johnston IH: Glycine and spinal inhibition. *Brain Res* 1967; 5:112-4
159. Werman R, Davidoff RA, Aprison MH: Inhibitory action of glycine on spinal neurons in the cat. *J Neurophysiol* 1968; 31:81-95
160. Lufty K, Woodward RM, Keana JF, Weber E: Inhibition of clonic seizure-like excitatory effects induced by intrathecal morphine using two NMDA receptor antagonists: MK-801 and ACEA-1011. *Eur J Pharmacol* 1994; 252:261-6
161. Serrao JM, Marks RL, Morley SJ, Goodchild CS: Intrathecal midazolam for the treatment of chronic mechanical low back pain: A controlled comparison with epidural steroid in a pilot study. *Pain* 1992; 48:5-12
162. Valentine JM, Lyons G, Bellamy MC: The effect of intrathecal midazolam on post-operative pain. *Eur J Anesthesiol* 1996; 13:589-93
163. Borg PA, Krijnen HJ: Long-term intrathecal administration of midazolam and clonidine. *Clin J Pain* 1996; 12:63-8
164. Albright AL, Ceervi A, Singletary J: Intrathecal baclofen for spasticity in cerebral palsy. *JAMA* 1991; 265:1418-22
165. Albright AL, Barron WB, Fasick MP, Polinko P, Janosky J: Continuous intrathecal baclofen infusion for spasticity of cerebral origin. *JAMA* 1993; 270:2475-7
166. Penn RD, Savoy SM, Corcos DM, Latash M, Gottlieb G, Parke B, Kroin JS: Intrathecal baclofen for severe spinal spasticity. *New England J Med* 1989; 320:1517-21
167. Penn RD: Intrathecal baclofen for spasticity of spinal origin: Seven years of experience. *J Neurosurg* 1992; 6:115-8
168. Stewart-Wynne EG, Silbert PL, Buffery S, Perlman D, Tan E: Intrathecal baclofen for severe spasticity: Five years experience. *Clin Exp Neurol* 1991; 28:244-55
169. Parke B, Penn RD, Savoy SM, Corcos DM: Functional outcome after delivery of intrathecal baclofen. *Arch Phys Med Rehab* 1989; 70:30-2
170. Broseta J, Garcia-March G, Sanchez-Ledesma MJ, Anaya J, Silva I: Chronic intrathecal baclofen administration in severe spasticity. *Stereotact Funct Neurosurg* 1990; 54/55:147-53
171. Armstrong RW, Steinbok P, Farrell K: Continuous intrathecal baclofen treatment of severe spasms in two children with spinal cord injury. *Dev Med Child Neurol* 1992; 34:731-8
172. Amano K, Kawamura H, Tanikawa T, Kawabatake H, Notani M, Iseki H, Shiwaku T, Nago T, Iwata Y, Taira T, Umezawa Y, Simizu T, Kitamura K: Long-term follow-up study of rostral mesencephalic reticulotomy for pain relief: report of 34 cases. *Appl Neurophysiol* 1986; 49:105-11
173. Loubser PG, Akman NM: Effects of intrathecal baclofen on chronic spinal cord injury pain. *J Pain Symptom Manag* 1996; 12:241-7
174. Herman RM, D'Luzansky SC, Ippolito R: Intrathecal baclofen

- suppresses central pain in patients with spinal lesions. A pilot study. *Clin J Pain* 1992; 8:338-45
175. Aanonsen LM, Wilcox GL: Muscimol, gamma-aminobutyric acid-A receptors and excitatory amino acids in the mouse spinal cord. *J Pharmacol Exp Therap* 1989; 248:1034-8
176. Dahlstrom A, Fuxe K: Evidence for the existence of monoamine neurons in the central nervous system: II. Experimentally induced changes in the intra-neuronal amine levels of bulbospinal neuron systems. *Acta Physiol Scand* 1965; 64:1-36
177. Willis WD, Coggeshall RE: *Sensory Mechanisms of the Spinal Cord*. New York, Plenum Press, 1991
178. Yaksh TL, Noueihed R: The physiology and pharmacology of spinal opiates. *Ann Rev Pharmacol Toxicol* 1985; 25:433-62
179. Hao J-X, Yu W, Xu XJ, Wiesenfeld-Hallin Z: Effects of intrathecal vs. systemic clonidine in treating chronic allodynia-like response in spinally injured rats. *Brain Res* 1996; 736:28-34
180. DeLander GE, Hopkins CJ: Interdependence of spinal adenosinergic, serotonergic and noradrenergic systems mediating antinociception. *Neuropharmacology* 1987; 26:1791-4
181. Monroe PJ, Smith DL, Kirk HR, Smith DJ: Spinal noradrenergic imidazoline receptors do not mediate the antinociceptive action of intrathecal clonidine in the rat. *J Pharmacol Exp Ther* 1995; 273:1057-62
182. Aran S, Proudfit HK: Antinociceptive interactions between intrathecally administered alpha noradrenergic agonists and 5'-N-ethylcarboxamide adenosine. *Brain Res* 1990; 519:287-93
183. Gordh T Jr, Jansson I, Hartvig P, Gillberg PG, Post C: Interactions between noradrenergic and cholinergic mechanisms involved in spinal nociceptive processing. *Acta Anaesth Scand* 1989; 33:39-47
184. Danzebrink RM, Gebhart GF: Antinociceptive effects of intrathecal adrenoceptor agonists in a rat model of visceral nociception. *J Pharmacol Exp Ther* 1990; 253:698-705
185. Murata K, Nakagawa I, Kumeta Y, Kitahata LM, Collins JG: Intrathecal clonidine suppresses noxiously evoked activity of spinal wide dynamic range neurons in cats. *Anesth Analg* 1989; 69:185-191
186. Sullivan AF, Dashwood MR, Dickenson AH: Alpha 2-adrenoceptor modulation of nociception in rat spinal cord: Location, effects and interactions with morphine. *Eur J Pharmacol* 1987; 138:169-77
187. Kanui TI, Tjolsen A, Lund A, Mjelle-Joly N, Hole K: Antinociceptive effects of intrathecal administration of alpha-adrenergic antagonists and clonidine in the formalin test in the mouse. *Neuropharmacology* 1993; 32:367-71
188. Yaksh TL, Pogrel JW, Lee YW, Chaplan SR: Reversal of nerve ligation-induced allodynia by spinal alpha-2 adrenoceptor agonists. *J Pharmacol Exp Ther* 1995; 272:207-14
189. Puke MJ, Xu XJ, Wiesenfeld-Hallin Z: Intrathecal administration of clonidine suppresses autotomy, a behavioral sign of chronic pain in rats after sciatic nerve section. *Neurosci Lett* 1991; 133:199-202
190. Coombs DW, Saunders RL, Fratkin JD, Jensen LE, Murphy CA: Continuous intrathecal hydromorphone and clonidine for intractable cancer pain. *J Neurosurg* 1986; 64:890-4
191. Eisenach JC, DuPen S, Dubois M, Miguel R, Allin D: Epidural clonidine analgesia for intractable cancer pain. *Pain* 1995; 61:391-9
192. Rauck RL, Eisenach JC, Jackson K, Young LD, Southern J: Epidural clonidine treatment for refractory reflex sympathetic dystrophy. *ANESTHESIOLOGY* 1993; 79:1163-9
193. Grace D, Bunting H, Milligan KR, Fee JPH: Post-operative analgesia after co-administration of clonidine and morphine by the intrathecal route in a patient undergoing hip replacement. *Anesth Analg* 1995; 80:86-91
194. Lee YW, Yaksh TL: Analysis of drug interaction between intrathecal clonidine and MK801 in peripheral neuropathic pain rat model. *ANESTHESIOLOGY* 1995; 82:741-8
195. Klimscha W, Chiari A, Krafft P, Plattner O, Taslimi R, Mayer N, Weinstabl C, Schneider B, Zimpfer M: Hemodynamic and analgesic effects of clonidine added repetitively to continuous epidural and spinal blocks. *Anesth Analg* 1995; 80:322-7
196. Filos KS, Goudas LC, Patroni O, Palyzou V: Hemodynamic and analgesic profile after intrathecal clonidine in humans. *ANESTHESIOLOGY* 1994; 81:591-601
197. Jensen TS, Schroder HD, Smith DF: The role of spinal pathways in dopamine mediated alteration in the tail-flick reflex in rats. *Neuropharmacology* 1984; 23:149-53
198. Liu QS, Qiao JT, Dafny N: D2 dopamine receptor involvement in spinal dopamine-produced antinociception. *Life Sci* 1992; 51:1485-92
199. Barasi S, Duggal KN: The effect of local and systemic application of dopaminergic agents on tail flick latency in the rat. *Eur J Pharmacol* 1985; 117:287-94
200. Jensen TS, Yaksh TL: Effects of an intrathecal dopamine agonist, apomorphine, on thermal and chemical evoked noxious responses in rats. *Brain Res* 1984; 296:285-93
201. Kang YM, Hu WM, Qiao JT: Endogenous opioids and ATP-sensitive potassium channels are involved in the mediation of apomorphine-induced antinociception at the spinal level: A behavioral study in rats. *Brain Res Bull* 1998; 46:225-8
202. Hasegawa Y, Kurachi M, Otomo S: Dopamine D2 receptors and spinal cord excitation in mice. *Eur J Pharmacol* 1990; 184:207-12
203. Stein WM, Read S: Chronic pain in the setting of Parkinson's disease and depression. *J Pain Symptom Manag* 1997; 14:255-8
204. Basbaum A: *Anatomical substrates for the descending control of nociception, Brain Stem Control of Spinal Mechanisms*. Edited by Sjolund B, Bjorklund A. Amsterdam, Elsevier Biomedical Press, 1982, pp 119-33
205. Fozard JR: 5-HT: The enigma variations. *Trends Pharmacol Sci* 1987; 8:501-6
206. Minor BG, Post C, Archer T: Blockade of intrathecal 5-hydroxytryptamine-induced antinociception in rats by noradrenaline depletion. *Neurosci Lett* 1985; 54:39-44
207. Richardson BP, Engel G, Donatsch P, Stadler PA: Identification of serotonin M-receptor subtypes and their specific blockade by a new class of drugs. *Nature* 1985; 316:126-31
208. Bardin L, Jourdan D, Alloui A, Lavarenne J, Eschaliere A: Differential influence of two serotonin 5-HT<sub>3</sub> receptor antagonists on spinal serotonin-induced analgesia in rats. *Brain Res* 1997; 765:267-72
209. Bardin L, Bardin M, Lavarenne J, Eschaliere A: Effect of intrathecal serotonin on nociception in rats: Influence of the pain test used. *Exp Brain Res* 1997; 113:81-7
210. Ali Z, Wu G, Kozlov A, Barasi S: The actions of 5-HT<sub>1</sub> agonists and antagonists on nociceptive processing in the rat spinal cord: Results from behavioural and electrophysiological studies. *Brain Res* 1994; 661:83-90
211. Mjelle N, Lund A, Eide PK, Storkson R, Tjolsen A: The role of 5-HT<sub>1A</sub> and 5-HT<sub>1B</sub> receptors in spinal nociceptive transmission and in the modulation of NMDA induced behavior. *Neuroreport* 1992; 3:1061-4
212. Alhaider AA, Wilcox GL: Differential roles of 5-hydroxytrypta-

## THE FUTURE OF INTRATHECAL ANALGESIA

mine 1A and 5-hydroxytryptamine 1B receptor subtypes in modulating spinal nociceptive transmission in mice. *J Pharmacol Exp Ther* 1993; 265:378-85

213. Danzebrink RM, Gebhart GF: Intrathecal coadministration of clonidine with serotonin receptor agonists produces supra-additive visceral antinociception in the rat. *Brain Res* 1991; 555:35-42

214. Sawynok J, Reid A: Noradrenergic mediation of spinal antinociception by 5-hydroxytryptamine: Characterization of receptor subtypes. *Eur J Pharmacol* 1992; 223:49-56

215. Kjorsvik A, Storkson R, Tjolsen A, Hole K: Differential effects of activation of lumbar and thoracic 5-HT<sub>2A/2C</sub> receptors on nociception in rats. *Pharmacol Biochem Behav* 1997; 56:523-7

216. Mjellem N, Lund A, Hole K: Different functions of spinal 5-HT<sub>1A</sub> and 5-HT<sub>2</sub> receptor subtypes in modulating behavior induced by excitatory amino acid receptor agonists in mice. *Brain Res* 1993; 626:78-82

217. Ali Z, Wu G, Kozlov A, Barasi S: The role of 5HT<sub>3</sub> in nociceptive processing in the rat spinal cord: Results from behavioural and electrophysiological studies. *Neurosci Lett* 1996; 208:203-7

218. Bowker RM, Westlund KN, Sullivan MC, Wilber JF, Coulter JD: Descending serotonergic, peptidergic and cholinergic pathways from the raphe nuclei: A multiple transmitter complex. *Brain Res* 1983; 288:33-48

219. Aquilonius S, Eckernas S, Gillberg P: Topographic localization of choline acetyltransferase within the human spinal cord and a comparison with some other species. *Brain Res* 1981; 211:329-40

220. Urban L, Willets J, Murae K, Randic M: Cholinergic effects on spinal dorsal horn neurons in vitro: An intracellular study. *Brain Res* 1989; 500:12-20

221. Abram SE, O'Connor TC: Characteristics of the analgesic effects and drug interactions of intrathecal carbachol in rats. *ANESTHESIOLOGY* 1995; 83:844-9

222. Yaksh TL, Dirksen R, Harty GJ: Antinociceptive effects of intrathecally injected cholinomimetic drugs in the rat and cat. *Eur J Pharmacol* 1985; 117:81-8

223. Gillberg PG, Gordh T Jr, Hartvig P, Jansson I, Pettersson J, Post C: Characterization of the antinociception induced by intrathecally administered carbachol. *Pharmacol Toxicol* 1989; 64:340-3

224. Bannon AW, Decker MW, Holladay MW, Curzon P, Donnelly-Roberts D, Puttfarcken PS, Bitner RS, Diaz A, Dickenson AH, Porsolt RD, Williams M, Arneric SP: Broad-spectrum, non-opioid analgesic activity by selective modulation of neuronal nicotinic acetylcholine receptors. *Science* 1998; 279:77-81

225. Abram SE, Winne RP: Intrathecal acetyl cholinesterase inhibitors produce analgesia that is synergistic with morphine and clonidine in rats. *Anesth Analg* 1995; 81:501-7

226. Hood DD, Eisenach JC, Tuttle R: Phase I safety assessment of intrathecal neostigmine methylsulfate in humans. *ANESTHESIOLOGY* 1995; 82:331-43

227. Hood DD, Mallak KA, Eisenach JC, Tong C: Interaction between intrathecal neostigmine and epidural clonidine in human volunteers. *ANESTHESIOLOGY* 1996; 85:315-25

228. Lauretti GR, Hood DD, Eisenach JC, Pfeifer BL: A multi-center study of intrathecal neostigmine for analgesia following vaginal hysterectomy. *ANESTHESIOLOGY* 1998; 89:913-8

229. Lauretti GR, Mattos AL, Reis MP, Prado WA: Intrathecal neostigmine for postoperative analgesia after orthopedic surgery. *J Clin Anesth* 1997; 9:473-7

230. Eisenach JC, Hood DD, Curry R: Phase I human safety assess-

ment of intrathecal neostigmine containing methyl- and propylparabens. *Anesth Analg* 1997; 85:842-6

231. Lauretti GR, Reis MP, Prado WA, Klamt JG: Dose-response study of intrathecal morphine versus intrathecal neostigmine, their combination, or placebo for postoperative analgesia in patients undergoing anterior and posterior vaginoplasty. *Anesth Analg* 1996; 82:1182-7

232. Boireau A, Bordier F, Durand G, Doble A: The antidepressant metopramine is a low-affinity antagonist at N-methyl-D-aspartic acid receptors. *Neuropharmacology* 1996; 35:1703-7

233. Watanabe Y, Saito H, Abe K: Tricyclic antidepressants block NMDA receptor-mediated synaptic responses and induction of long-term potentiation in rat hippocampal slices. *Neuropharmacology* 1993; 32:479-86

234. Mjellem N, Lund A, Hole K: Reduction of NMDA-induced behavior after acute and chronic administration of desipramine in mice. *Neuropharmacology* 1993; 32:591-5

235. Eisenach JC, Gebhart GF: Intrathecal amitriptyline acts as an N-methyl-D-aspartate receptor antagonist in the presence of inflammatory hyperalgesia in rats. *ANESTHESIOLOGY* 1995; 83:1046-54

236. Eisenach JC, Gebhart GF: Intrathecal amitriptyline-antinociceptive interactions with intravenous morphine and intrathecal clonidine, neostigmine, and carbamylcholine in rats. *ANESTHESIOLOGY* 1995; 83:1036-45

237. Sawynok J: Adenosine receptor activation and nociception. *Eur J Pharmacol* 1998; 347:1-11

238. Taiwo YO, Levine JD: Further confirmation of the role of adenylyl cyclase and of cAMP-dependent protein kinase in primary afferent hyperalgesia. *Neuroscience* 1991; 44:131-5

239. Sawynok J, Reid A: Role of G-proteins and adenylate cyclase in antinociception produced by intrathecal purines. *Eur J Pharmacol* 1988; 156:25-34

240. Li J, Perl ER: Adenosine inhibition of synaptic transmission in the substantia gelatinosa. *J Neurophysiol* 1994; 72:1611-21

241. Sawynok J, Zarrindast MR, Reid AR, Doak GJ: Adenosine A<sub>3</sub> receptor activation produces nociceptive behaviour and edema by release of histamine and 5-hydroxytryptamine. *Eur J Pharmacol* 1997; 333:1-7

242. Sawynok J, Reid A, Isbrucker R: Adenosine mediates calcium-induced antinociception and potentiation of noradrenergic antinociception in the spinal cord. *Brain Res* 1990; 524:187-195

243. Aran S, Proudfit HK: Antinociception produced by interactions between intrathecally administered adenosine agonists and norepinephrine. *Brain Res* 1990; 513:255-63

244. Reeve AJ, Dickenson AH: Electrophysiological study on spinal antinociceptive interactions between adenosine and morphine in the dorsal horn of the rat. *Neurosci Lett* 1995; 194:81-4

245. Zarrindast MR, Nikfar S: Different influences of adenosine receptor agonists and antagonists on morphine antinociception in mice. *Gen Pharmacol* 1994; 25:139-42

246. Yang SW, Zhang ZH, Chen JY, Xie YF, Qiao JT, Dafny N: Morphine and norepinephrine-induced antinociception at the spinal level is mediated by adenosine. *Neuroreport* 1994; 5:1441-4

247. Suh HW, Song DK, Kim YH: Differential effects of adenosine receptor antagonists injected intrathecally on antinociception induced by morphine and beta-endorphin administered intracerebroventricularly in the mouse. *Neuropeptides* 1997; 31:339-44

248. Zarrindast MR, Iraie F, Heidari MR, Mohagheghi-Badi M: Effect

of adenosine receptor agonists and antagonists on morphine-induced catalepsy in mice. *Eur J Pharmacol* 1997; 338:11-6

249. Sollevi A, Belfrage M, Lundberg T, Segerdahl M, Hansson P: Systemic adenosine infusion: A new treatment modality to alleviate neuropathic pain. *Pain* 1995; 61:155-8

250. Rane K, Segerdahl M, Gojny M, Sollevi A: Intrathecal adenosine administration: A phase I clinical safety study in healthy volunteers, with additional evaluation of its influence on sensory thresholds and experimental pain. *ANESTHESIOLOGY* 1998; 89:1108-15

251. Karlsten R, Gordh T Jr: An A1-selective adenosine agonist abolishes allodynia elicited by vibration and touch after intrathecal injection. *Anesth Analg* 1995; 80:847

252. Dow RS: Action potentials of cerebellar cortex in response to local electrical stimulation. *J Neurophysiol* 1949; 12:245-56

253. Bloom FE: Neurohumoral transmission and the central nervous system, Goodman and Gilman's *The Pharmacological Basis of Therapeutics*. Edited by Gilman AG, Goodman LS, Rall TW, Murad F. New York, MacMillan Publishing Company, 1985, pp 236-59

254. Duggan AW, Hope PJ, Jarrott B, Schaible HG, Fleetwood-Walker SM: Release, spread and persistence of immunoreactive neurokinin A in the dorsal horn of the cat following noxious cutaneous stimulation. Studies with antibody microprobes. *Neuroscience* 1990; 35:195-202

255. Akil H, Watson SJ, Young E, Lewis ME, Khachaturian H, Walker JM: Endogenous opioids: Biology and function. *Ann Rev Neurosci* 1984; 7:223-55

256. Satoh M, Minami M: Molecular pharmacology of the opioid receptors. *Pharmacol Ther* 1995; 68:343-65

257. Reisine T: Opiate Receptors. *Neuropharmacology* 1995; 34:463-72

258. Dado RJ, Law PY, Loh HH, Elde R: Immunofluorescent identification of a delta-opioid receptor on primary afferent nerve terminals. *Neuroreport* 1993; 5:341-4

259. Ji R-R, Zhang Q, Law P-Y, Low HH, Elde R, Hokfelt T: Expression of  $\mu$ -,  $\delta$ -, and  $\kappa$ -opioid receptor-like immunoreactivities in rat dorsal root ganglia after carrageenan-induced inflammation. *J Neurosci* 1995; 15:8156-66

260. Bartho L, Stein C, Herz A: Involvement of capsaicin-sensitive neurones in hyperalgesia and enhanced opioid antinociception in inflammation. *Naunyn-Schmied Arch Pharmacol Exp Pathol* 1990; 342:666-70

261. Simon EJ, Hiller JM: The opiate receptors. *Ann Rev Pharmacol Toxicol* 1978; 18:371-94

262. Harada Y, Nishioka K, Kitahata LM, Nakatani K, Collins JG: Contrasting actions of intrathecal U50,488, morphine, or [D-Pen<sup>2</sup>,D-Pen<sup>5</sup>] enkephalin or intravenous U50,488 on the visceromotor response to colorectal distension in the rat. *ANESTHESIOLOGY* 1995; 83:336-43

263. Brennan TJ, Umali EF, Zahn PK: Comparison of pre- versus post-incision administration of intrathecal bupivacaine and intrathecal morphine in a rat model of postoperative pain. *ANESTHESIOLOGY* 1997; 87:1517-28

264. Omote K, Kitahata LM, Collins JG, Nakatani K, Nakagawa I: The antinociceptive role of mu- and delta-opiate receptors and their interactions in the spinal dorsal horn of cats. *Anesth Analg* 1990; 71:23-8

265. Yaksh TL, Gross KE, Li CH: Studies on the intrathecal effect of beta-endorphin in primate. *Brain Res* 1982; 241:261-9

266. Kuraishi Y, Satoh M, Harada Y, Akaike A, Shibata T, Takagi H: Analgesic action of intrathecal and intracerebral beta-endorphin in rats: Comparison with morphine. *Eur J Pharmacol* 1980; 67:143-6

267. Tseng LF, Collins KA: The tail-flick inhibition induced by beta-endorphin administered intrathecally is mediated by activation of kappa- and mu-opioid receptors in the mouse. *Eur J Pharmacol* 1992; 214:59-65

268. Nagasaka H, Awad H, Yaksh TL: Peripheral and spinal actions of opioids in the blockade of the autonomic response evoked by compression of the inflamed knee joint. *ANESTHESIOLOGY* 1996; 85:808-16

269. Yamamoto T, Yaksh TL: Comparison of the antinociceptive effects of pre- and posttreatment with intrathecal morphine and MK801, an NMDA antagonist, on the formalin test in the rat. *ANESTHESIOLOGY* 1992; 77:757-63

270. Yamamoto T, Nozaki-Taguchi N: Clonidine, but not morphine, delays the development of thermal hyperesthesia induced by sciatic nerve constriction injury in the rat. *ANESTHESIOLOGY* 1996; 85:835-45

271. Nichols ML, Lopez Y, Ossipov MH, Bian D, Porreca F: Enhancement of the antiallodynic and antinociceptive efficacy of spinal morphine by antisera to dynorphin A (1-13) or MK-801 in a nerve-ligation model of peripheral neuropathy. *Pain* 1997; 69:317-22

272. Hammond DL, Wang H, Nakashima N, Basbaum AI: Differential effects of intrathecally administered delta and mu opioid receptor agonists on formalin-evoked nociception and on the expression of Fos-like immunoreactivity in the spinal cord of the rat. *J Pharmacol Exp Ther* 1998; 284:378-87

273. Herman BH, Goldstein A: Antinociception and paralysis induced by intrathecal dynorphin A. *J Pharmacol Exp Ther* 1985; 232:27-32

274. Faden AI, Jacobs TP: Dynorphin induces partially reversible paraplegia in the rat. *Eur J Pharmacol* 1983; 91:321-4

275. Vanderah TW, Laughlin T, Lashbrook JM, Nichols ML, Wilcox GL, Ossipov MH, Malan TP Jr, Porreca F: Single intrathecal injections of dynorphin A or des-Tyr-dynorphins produce long-lasting allodynia in rats: Blockade by MK-801 but not naloxone. *Pain* 1996; 68:275-81

276. Yaksh TL: Spinal opiate analgesia: Characteristics and principles of action. *Pain* 1981; 11:293-346

277. Behar M, Magora F, Olshwang D: Epidural morphine treatment of pain. *Lancet* 1979; 1:527-8

278. Coombs DW, Saunders RL, Gaylor MS: Continuous epidural analgesia via implanted morphine reservoir. *Lancet* 1981; 2:425-6

279. Winkelmuller M, Winkelmuller W: Long-term effect of continuous intrathecal opioid treatment in chronic pain of nonmalignant etiology. *J Neurosurg* 1996; 85:458-67

280. Shetter AG, Hadley MN, Wilkinson E: Administration of intraspinal morphine sulfate for the treatment of intractable cancer pain. *Neurosurgery* 1986; 18:740-7

281. Coombs DW, Saunders RL, Gaylor MS, Block AR, Colton T, Harbaugh R, Pagneau MG, Mroz W: Relief of continuous chronic pain by intraspinal narcotic infusion via an implanted reservoir. *JAMA* 1983; 250:2336-9

282. Auld AW, Maki-Jokela A, Murdoh DM: Intraspinal narcotic analgesia in the treatment of chronic pain. *Spine* 1985; 10:777-81

283. Krames ES, Gershow J, Kenefick T, Lyons A, Taylor P, Wilkie D: Continuous infusion of spinally administered narcotics for the relief of pain due to malignant disorders. *Cancer* 1985; 56:696-702

284. Hassenbusch SJ, Pillay PK, Maginac M, Currie K, Bay JW, Covington EC, Tomaszewski MZ: Constant infusion of morphine for intractable cancer pain using an implanted pump. *J Neurosurg* 1990; 73:405-9



## THE FUTURE OF INTRATHECAL ANALGESIA

285. Penn RD, Paice JA: Chronic intrathecal morphine for intractable pain. *J Neurosurg* 1987; 67:182-6
286. Gestin Y, Vainio A, Perurier AM: Long-term intrathecal infusion of morphine in the home care of patients with advanced cancer. *Acta Anaesth Scand* 1997; 41:12-7
287. Wagemans MF, van der Valk P, Spoelder EM, Zuurmond WW, de Lange JJ: Neurohistopathological findings after continuous intrathecal administration of morphine or a morphine/bupivacaine mixture in cancer pain patients. *Acta Anaesth Scand* 1997; 41:1033-8
288. Alhashemi JA, Crosby ET, Grodecki W, Duffy PJ, Hull KA, Gallant C: Treatment of intrathecal morphine-induced pruritis following caesarean section. *Can J Anaesth* 1997; 44:1060-5
289. Yoshida GM, Nelson RW, Capen DA, Nagelberg S, Thomas JC, imoldi RL, Haye W: Evaluation of continuous intraspinal narcotic analgesia for chronic pain from benign causes. *Am J Orthop* 1996; 5:693-4
290. Sjogren P, Thunedborg LP, Christrup L, Hansen SH, Franks J: Is development of hyperalgesia, allodynia and myoclonus related to morphine metabolism during long-term administration? Six case histories. *Acta Anaesth Scand* 1998; 42:1070-5
291. Oyama T, Matsuki A, Taneichi T, Ling N, Guillemin R: Beta-endorphin in obstetric analgesia. *Am J Obstet Gynecol* 1980; 37:613-6
292. Oyama T, Jin T, Yamaya R, Ling N, Guillemin R: Profound analgesic effects of beta-endorphin in man. *Lancet* 1980; 1:122-4
293. Wen HL, Mehal ZD, Ong BH, Ho WK: Treatment of pain in cancer patients by intrathecal administration of dynorphin. *Peptides* 1987; 8:191-3
294. Wen HL, Mehal ZD, Ong BH, Ho WK, Wen DY: Intrathecal administration of beta-endorphin and dynorphin-(1-13) for the treatment of intractable pain. *Life Sci* 1985; 37:1213-20
295. Nakanishi S: Substance P precursor and kininogen: Their structures, gene organizations and regulation. *Physiol Rev* 1987; 7:1117-42
296. Maggio JE: Tachykinins. *Ann Rev Neurosci* 1988; 11:13-28
297. Helke CJ, Krause JE, Mantyh PW, Couture R, Bannon MJ: Diversity in mammalian tachykinin peptidergic neuron: Multiple peptides, receptors, and regulatory mechanisms. *FASEB J* 1990; 4:1606-1615
298. Brechenmacher C, Larmet Y, Feltz P, Rodeau JL: Cultured rat sensory neurones express functional tachykinin receptor subtypes 1, 2 and 3. *Neurosci Lett* 1998; 241:159-62
299. Xu XJ, Maggi CA, Wiesenfeld-Hallin Z: On the role of NK2 tachykinin receptors in the mediation of the spinal reflex excitability in the rat. *Neuroscience* 1991; 44:483-90
300. Xu XJ, Dalsgaard CJ, Wiesenfeld-Hallin Z: Spinal substance P and N-methyl-D-aspartate receptors are coactivated in the induction of central sensitization of the nociceptive flexor reflex. *Neuroscience* 1992; 51:641-8
301. Dougherty PM, Palecek J, Paleckova V, Willis WD: Neurokinin 1 and 2 antagonists attenuate the responses and NK1 antagonists prevent the sensitization of primate spinothalamic tract neurons after intradermal capsaicin. *J Neurophysiol* 1994; 72:1464-75
302. Dougherty PM, Palecek J, Zorn S, Willis WD: Combined application of excitatory amino acids and substance P produces long-lasting changes in responses of primate spinothalamic tract neurons. *Brain Res Rev* 1993; 18:227-46
303. Dougherty PM, Willis WD: Enhancement of spinothalamic neuron responses to chemical and mechanical stimuli following combined micro-iontophoretic application of N-methyl-D-aspartic acid and substance P. *Pain* 1992; 47:85-93
304. Henry JL, Krnjevic K, Morris ME: Substance P and spinal neurones. *Can J Physiol Pharmacol* 1975; 53:423-32
305. Krnjevic K: Effects of substance P on central neurons in cats, Substance P. Edited by VonEuler US, Pernow B. New York, Raven Press, 1977, pp 217-30
306. Hylden JLK, Wilcox GL: Pharmacological characterization of substance P-induced nociception in mice: Modulation by opioid and nordrenergic agonists at the spinal level. *J Pharmacol Exp Therap* 1983; 226:398-404
307. Frenk H, Bossut D, Urca G, Mayer DJ: Is substance P a primary afferent neurotransmitter for nociceptive input? I. Analysis of pain-related behaviors resulting from intrathecal administration of substance P and 6 excitatory compounds. *Brain Res* 1988; 455:223-31
308. Cridland RA, Henry JL: Comparison of the effects of substance P, neurokinin A, physalaemin and eledoisin in facilitating a nociceptive reflex in the rat. *Brain Res* 1986; 381:93-9
309. Urban L, Randic M: Slow excitatory transmission in rat dorsal horn: Possible mediation by peptides. *Brain Res* 1984; 290:336-41
310. Murase K, Ryu PD, Randic M: Substance P augments a persistent slow inward calcium-sensitive current in voltage-clamped spinal dorsal horn neurons of the rat. *Brain Res* 1986; 365:369-76
311. Randic M, Hecimovic H, Ryu PD: Substance P modulates glutamate-induced currents in acutely isolated rat spinal dorsal horn neurones. *Neurosci Lett* 1990; 117:74-80
312. Randic M, Miletic V: Effect of substance P in cat dorsal horn neurones activated by noxious stimuli. *Brain Res* 1977; 128:164-9
313. Zieglansberger W, Tulloch IF: Effects of substance P on neurones in the dorsal horn of the spinal cord of the cat. *Brain Res* 1979; 166:273-82
314. Willcockson WS, Chung JM, Hori Y, Lee KH, Willis WD: Effects of iontophoretically released peptides on primate spinothalamic tract cells. *J Neurosci* 1984; 4:741-50
315. Fleetwood-Walker SM, Mitchell R, Hope PJ, El-Yassir N, Molony V, Bladon CM: The involvement of neurokinin receptor subtypes in somatosensory processing in the superficial dorsal horn of the cat. *Brain Res* 1990; 519:169-82
316. Kellenstein DE, Price DD, Hayes RL, Mayer DJ: Evidence that substance P selectively modulates C-fiber-evoked discharges of dorsal horn nociceptive neurons. *Brain Res* 1990; 526:291-8
317. Piercey MF, Moon MW, Blinn JR, Dobry-Schreur PJK: Analgesic activities of spinal cord substance P antagonists implicate substance P as a neurotransmitter of pain sensation. *Brain Res* 1986; 385:74-85
318. Brugger F, Evans RH, Hawkins NS: Effects of N-methyl-D-aspartate antagonists and spantide on spinal reflexes and responses to substance P and capsaicin in isolated spinal cord preparations from mouse and rat. *Neuroscience* 1990; 36:611-22
319. Yashpal K, Radhakrishnan V, Henry JL: NMDA receptor antagonists block the facilitation of the tail flick reflex in the rat induced by intrathecal administration of substance P and noxious cutaneous stimulation. *Neurosci Lett* 1997; 128:269-72
320. Murray CW, Cowan A, Larson AA: Neurokinin and NMDA antagonists (but not a kainic acid antagonist) are antinociceptive in the mouse formalin model. *Pain* 1991; 44:179-85
321. Picard P, Boucher S, Regoli D, Gitter BD, Howbert JJ, Couture R: Use of non-peptide tachykinin receptor antagonists to substantiate the involvement of NK1 and NK2 receptors in a spinal nociceptive reflex in the rat. *Eur J Pharmacol* 1993; 232:255-61
322. Radhakrishnan V, Henry JL: Novel substance P antagonist,

- CP-96345, blocks responses of cat dorsal horn neurons to noxious cutaneous stimulation and substance P. *Neurosci Lett* 1991; 132:39-43
323. Urban L, Maggi CA, Nagy I, Dray A: The selective NK2 receptor antagonist MEN 10376 inhibits synaptic excitation of dorsal horn neurons evoked by C-fibre activation in the in vitro rat spinal cord. *Neuropeptides* 1992; 22:68
324. Zimmer A, Zimmer AM, Baffi J, Usdin T, Reynolds K, Konig M, Palkovits M, Mezey E: Hypoalgesia in mice with a targeted deletion of the tachykinin 1 gene. *Proc Natl Acad Sci U S A* 1998; 95:2630-5
325. Cao YQ, Mantyh PW, Carlson EJ, Gillespie AM, Epstein CJ, Basbaum AI: Primary afferent tachykinins are required to experience moderate to intense pain. *Nature* 1998; 392:390-4
326. DeFelipe C, Herrero JF, O'Brien JA, Palmer JA, Doyle CA, Smith AJ, Laird JM, Belmonte C, Cervero F, Hunt SP: Altered nociception, analgesia and aggression in mice lacking the receptor for substance P. *Nature* 1998; 392:334-5
327. Hua XY, Chen P, Polgar E, Nagy I, Marsala M, Phillips E, Wollaston L, Urban L, Yaksh TL, Webb M: Spinal neurokinin NK1 receptor down-regulation and antinociception: Effects of spinal NK1 receptor antisense oligonucleotides and NK1 receptor occupancy. *J Neurochem* 1998; 70:688-98
328. Kramer MS, Cutler N, Feighner J, Shrivastava R, Carman J, Sramek JJ, Reines SA, Liu G, Snavely D, Wyatt-Knowles E, Hale JJ, Mills SG, MacCoss M, Swain CJ, Harrison T, Hill RG, Hefti F, Scolnick EM, Cascieri MA, Chicchi GG, Sadowski S, Williams AR, Hewson L, Smith D, Carlson EJ, Hargreaves RJ, Rupniak NMJ: Distinct mechanism for antidepressant activity by blockade of central substance P receptors. *Science* 1998; 281:1640-5
329. Dionne RA, Max MB, Gordon SM, Parada S, Sang C, Gracely RH, Sethna NF, MacLean DB: The substance P receptor antagonist CP-99,994 reduces acute postoperative pain. *Clin Pharmacol Ther* 1998; 64:562-8
330. Skofitsch G, Jacobowitz DM: Calcitonin- and calcitonin gene-related peptide: Receptor binding in the central nervous system, *Handbook of Chemical Neuroanatomy, Volume 11: Neuropeptide Receptors in the CNS*. Edited by Bjorklund A, Hokfelt T, Kuhar MJ. Amsterdam, Elsevier Science, 1992, pp 97-144
331. Amara SG, Jonas V, Rosenfeld MG, Ong ES, Evans RM: Alternative RNA processing of calcitonin gene expression generates mRNAs encoding different polypeptide products. *Nature* 1982; 298:240-4
332. Franco-Cereceda A, Henke H, Lundberg JM, Petermann JB, Hokfelt T, Fischer JA: Calcitonin gene-related peptide (CGRP) in capsaicin-sensitive substance P-immunoreactive sensory neurons in animals and man: Distribution and release by capsaicin. *Peptides* 1987; 8:399-410
333. Wiesenfeld-Hallin Z, Hokfelt T, Lundberg JM, Forssman WO, Reinecke M, Tschopp FA, Fischer JA: Immunoreactive calcitonin gene-related peptide and substance P coexist in sensory neurons to the spinal cord and interact in spinal behavioral responses of the rat. *Neurosci Lett* 1984; 52:199-204
334. Cameron AA, Leah JD, Snow PJ: The coexistence of neuropeptides in feline sensory neurons. *Neuroscience* 1988; 27:969-79
335. Sluka KA, Dougherty PM, Sorkin LS, Willis WD, Westlund KN: Neural changes in acute arthritis in monkeys: III. Changes in substance P, calcitonin gene-related peptide and glutamate in the dorsal horn of the spinal cord. *Brain Res Rev* 1992; 17:29-38
336. Cameron AA, Cliffer KD, Dougherty PM, Garrison CJ, Willis WD, Carlton SM: Time course of degenerative and regenerative changes in the dorsal horn in a rat model of peripheral neuropathy. *J Comp Neurol* 1997; 379:428-42
337. Morton CR, Hutchison WD: Release of sensory neuropeptides in the spinal cord: Studies with calcitonin gene-related peptide and galanin. *Neuroscience* 1989; 31:807-15
338. Saria A, Gamse R, Petermann J, Fischer JA, Theodorsson-Norheim E, Lundberg JM: Simultaneous release of several tachykinins and calcitonin gene-related peptide from rat spinal cord slices. *Neurosci Lett* 1986; 63:310-4
339. Yu LC, Hansson P, Lundberg T: The calcitonin gene-related peptide antagonist CGRP8-37 increases the latency to withdrawal responses in rats. *Brain Res* 1994; 223-30
340. Cridland RA, Henry JL: Effects of intrathecal administration of neuropeptides on a spinal nociceptive reflex in the rat: VIP, galanin, CGRP, TRH, somatostatin and angiotensin II. *Neuropeptides* 1988; 11:23-32
341. Cridland RA, Henry JL: Intrathecal administration of CGRP in the rat attenuates a facilitation of the tail flick reflex induced by either substance P or noxious cutaneous stimulation. *Neurosci Lett* 1989; 102:241-6
342. Oku R, Satoh M, Fujii N, Otaka A, Yajima H, Takagi H: Calcitonin gene-related peptide promotes mechanical nociception by potentiating release of substance P from the spinal dorsal horn in rats. *Brain Res* 1987; 403:350-4
343. Lofgren O, Yu LC, Theodorsson E, Hansson P, Lundberg T: Intrathecal CGRP(8-37) results in a bilateral increase in hindpaw withdrawal latency in rats with a unilateral thermal injury. *Neuropeptides* 1997; 31:601-7
344. Yu LC, Hansson P, Lundberg T: The calcitonin gene-related peptide antagonist CGRP8-37 increases the latency to withdrawal responses bilaterally in rats with unilateral experimental mononeuropathy, an effect reversed by naloxone. *Neuroscience* 1996; 71:523-31
345. Menard DP, van Rossum D, Kar S, StPierre S, Sutak M, Jhamandas K, Quirion R: A calcitonin gene-related peptide receptor antagonist prevents the development of tolerance to spinal morphine analgesia. *J Neurosci* 1996; 16:2342-51
346. Terenius L: Somatostatin and ACTH are peptides with partial antagonist-like selectivity for opiate receptors. *Eur J Pharmacol* 1976; 38:211-3
347. Krantic S, Quirion R, Uhl G: Somatostatin receptors, *Handbook of Chemical Neuroanatomy, Volume 11: Neuropeptide Receptors in the CNS*. Edited by Bjorklund A, Hokfelt T, Kuhar MJ. Amsterdam, Elsevier Science, 1992, pp 321-46
348. Schonbrunn A, Gu YZ, Dournard P, Beaudet A, Tannenbaum GS, Brown PJ: Somatostatin receptor subtypes: Specific expression and signaling properties. *Metabolism* 1996; 45:8-11
349. Morton CR, Hutchison WD, Hendry IA, Duggan AW: Somatostatin: Evidence for a role in thermal nociception. *Brain Res* 1989; 488:89-96
350. Kuraishi Y, Hirota N, Sato Y, Hino Y, Satoh M, Takagi H: Evidence that substance P and somatostatin transmit separate information related to pain in the spinal dorsal horn. *Brain Res* 1985; 325:294-8
351. Tiseo PJ, Adler MW, Liu-Chen LY: Differential release of substance P and somatostatin in the rat spinal cord in response to noxious cold and heat; effect of dynorphin A (1-17). *J Pharmacol Exp Ther* 1990; 252:539-45
352. Chapman V, Dickenson AH: The effects of sandostatin and

## THE FUTURE OF INTRATHECAL ANALGESIA

somatostatin on nociceptive transmission in the dorsal horn of the rat spinal cord. *Neuropeptides* 1992; 23:147-52

353. Traub RJ, Brozoski D: Anti-somatostatin antisera, but neither a somatostatin agonist (octreotide) nor antagonist (CYCAM), attenuates hyperalgesia in the rat. *Peptides* 1996; 17:769-73

354. Sandkuhler J, Fu QG, Helmchen C: Spinal somatostatin superfusion in vivo affects activity of cat nociceptive dorsal horn neurons: Comparison with spinal morphine. *Neuroscience* 1990; 34:565-76

355. Wiesenfeld-Hallin Z: Substance P and somatostatin modulate spinal cord excitability via physiologically different sensory pathways. *Brain Res* 1986; 372:172-5

356. Ohno H, Kuraishi Y, Minami M, Satoh M: Modality-specific antinociception produced by intrathecal injection of anti-somatostatin antiserum in rats. *Brain Res* 1988; 474:197-200

357. Randic M, Miletic V: Depressant action of methionine-enkephalin and somatostatin in cat dorsal horn neurones activated by noxious stimuli. *Brain Res* 1978; 152:196-202

358. Spampinato S, Romualdi P, Candeletti S, Cavicchini E, Ferri S: Distinguishable effects of intrathecal dynorphins, somatostatin, neurotensin and s-calcitonin on nociception and motor function in the rat. *Pain* 1988; 35:95-104

359. Gaumann DM, Grabow TS, Yaksh TL, Casey SJ, Rodriguez M: Intrathecal somatostatin, somatostatin analogs, substance P analog and dynorphin A cause comparable neurotoxicity in rats. *Neuroscience* 1990; 39:761-74

360. Gaumann DM, Yaksh TL, Post C, Wilcox GL, Rodriguez M: Intrathecal somatostatin in cat and mouse studies on pain, motor behavior, and histopathology. *Anesth Analg* 1989; 68:623-32

361. Mollenholt P, Rawal N, Gordh T Jr, Olsson Y: Intrathecal and epidural somatostatin for patients with cancer. *ANESTHESIOLOGY* 1994; 81:534-42

362. Paice JA, Penn RD, Kroin JS: Intrathecal octreotide for relief of intractable nonmalignant pain: 5-year experience with two cases. *Neurosurgery* 1996; 38:203-7

363. Rowan S, Todd AJ, Spike RC: Evidence that neuropeptide Y is present in GABAergic neurons in the superficial dorsal horn of the rat spinal cord. *Neuroscience* 1993; 53:537-45

364. Quirion R, Martel J-C: Brain neuropeptide Y receptors. Distribution and possible relevance to function, *Handbook of Chemical Neuroanatomy, Volume 11: Neuropeptide Receptors in the CNS*. Edited by Bjorklund A, Hokfelt T, Kuhar MJ. Amsterdam, Elsevier Science, 1992, pp 247-88

365. Walker MW, Ewald DA, Perney TM, Miller RJ: Neuropeptide Y modulates neurotransmitter release and Ca<sup>++</sup> currents in rat sensory neurons. *J Neurosci* 1988; 8:2438-46

366. Melander T, Kohler C, Nilsson S, Fisone G, Bartfai T, Hokfelt T: 125I-Galanin binding sites in the rat central nervous system, *Handbook of Chemical Neuroanatomy, Volume 11: Neuropeptide Receptors in the CNS*. Edited by Bjorklund A, Hokfelt T, Kuhar MJ. Amsterdam, Elsevier Science, 1992, pp 187-222

367. Wiesenfeld-Hallin Z, Xu XJ, Villar MJ, Hokfelt T: The effect of intrathecal galanin on the flexor reflex in rat: Increased depression after sciatic nerve section. *Neurosci Lett* 1989; 105:149-54

368. Melander T, Hokfelt T, Rokaeus A: Distribution of galanin-like immunoreactivity in the rat CNS. *J Comp Neurol* 1986; 248:475-517

369. Oldfield BJ, Allen AM, Hards DK, Kerrigan S, McKinley MJ, Mendelsohn FAO: The distribution of angiotensin II receptors in the spinal cord of the sheep. *Neurosci Lett* 1989; S34:S130

370. Allen AM, Paxinos G, Song KF, Mendelsohn FAO: Localization

of angiotensin receptor binding sites in the rat brain., *Handbook of Chemical Neuroanatomy, Volume 11: Neuropeptide Receptors in the CNS*. Edited by Bjorklund A, Hokfelt T, Kuhar MJ: Amsterdam, Elsevier Science, 1992, pp 1-37

371. Moody TW, Wada E, Battey J: Bombesin/GRP receptors, *Handbook of Chemical Neuroanatomy, Volume 11: Neuropeptide Receptors in the CNS*. Edited by Bjorklund A, Hokfelt T, Kuhar MJ. Amsterdam, Elsevier Science, 1992, pp 55-96

372. Tribollet E: Vasopressin and oxytocin receptors in the rat brain, *Handbook of Chemical Neuroanatomy, Volume 11: Neuropeptide Receptors in the CNS*. Edited by Bjorklund A, Hokfelt T, Kuhar MJ. Amsterdam, Elsevier Science, 1992, pp 289-320

373. Magistretti PJ, Martin J-L, Hof PR, Palacios JM: Vasoactive intestinal peptide (VIP) receptors, *Handbook of Chemical Neuroanatomy, Volume 11: Neuropeptide Receptors in the CNS*. Edited by Bjorklund A, Hokfelt T, Kuhar MJ. Amsterdam, Elsevier Science, 1992, pp 347-97

374. Bishop JF, Moody TW, O'Donohue TL: Peptide transmitters of primary sensory neurons: Similar actions of tachykinins and bombesin-like peptides. *Peptides* 1986; 7:835-42

375. Jęćinija S, Murase K, Nedeljkov V, Randic M: Vasoactive intestinal polypeptide excites mammalian dorsal horn neurons both in vivo and in vitro. *Brain Res* 1982; 243:158-64

376. Watkins LR, Martin D, Ulrich P, Tracey KJ, Maier SF: Evidence for the involvement of spinal cord glia in subcutaneous formalin induced hyperalgesia in the rat. *Pain* 1997; 71:225-35

377. Simmons ML, Murphy S: Induction of nitric oxide synthase in glial cells. *J Neurochem* 1992; 59:897-905

378. Vane JR, Bakhle YS, Botting RM: Cyclooxygenases 1 and 2. *Ann Rev Pharmacol Toxicol* 1998; 38:97-120

379. Marriott DR, Wilkin GP, Wood JN: Substance P-Induced release of prostaglandins from astrocytes: Regional specialisation and correlation with phosphoinositol metabolism. *J Neurochem* 1991; 56:259-65

380. Moncada S, Flower RJ, Vane JR: Prostaglandins, prostacyclin, thromboxane A<sub>2</sub>, and leukotrienes, *Goodman and Gilman's The Pharmacological Basis of Therapeutics*. Edited by Gilman AG, Goodman LS, Rall TW, Murad F. New York, MacMillan Publishing Company, 1985, pp 660-73

381. Levine JD, Lam D, Taiwo YO, Donatoni P, Goetzl EJ: Hyperalgesic properties of 15-lipoxygenase products of arachidonic acid. *Proc Natl Acad Sci U S A* 1986; 83:5331-4

382. Martin H, Basbaum A, Kwiat G, Goetzl E, Levine J: Leukotiene and prostaglandins sensitization of cutaneous high-threshold C- and A-delta mechanonociceptors in hairy skin of rat hindlimbs. *Neuroscience* 1987; 22:651-9

383. Madison S, Whitsel EA, Suarez-Roca H, Maixner W: Sensitizing effects of leukotriene B<sub>4</sub> on intradermal primary afferents. *Pain* 1992; 49:99-104

384. Bisgaard H, Kristensen JK: Leukotriene B<sub>4</sub> produces hyperalgesia in humans. *Prostaglandins* 1985; 30:791-7

385. Yaksh TL, Dirig DM, Malmberg AB: Mechanism of action of nonsteroidal anti-inflammatory drugs. *Cancer Invest* 1998; 16:509-27

386. McCormack K: Non-steroidal anti-inflammatory drugs and spinal nociceptive processing. *Pain* 1994; 59:9-43

387. Yaksh TL, Malmberg AB: Spinal actions of NSAIDs in blocking spinally mediated hyperalgesia: The role of cyclooxygenase products. *Agents and Actions Suppl* 1993; 41:89-100

388. Vasko MR: Prostaglandin-induced neuropeptide release from spinal cord, *Progress in Brain Research*. Edited by Nyberg F, Sharma

HS, Wiesenfeld-Hallin Z. Amsterdam, Elsevier Science BV, 1995, pp 368-80

389. Malmberg AB, Hamberger A, Hedner T: Effects of prostaglandin E2 and capsaicin on behavior and cerebrospinal fluid amino acid concentrations of unanesthetized rats: A microdialysis study. *J Neurochem* 1995; 65:2193

390. Malmberg AB, Yaksh TL: Pharmacology of the spinal action of ketorolac, morphine, ST-91, U50488H, and L-PIA on the formalin test and an isobolographic analysis of the NSAID interaction. *ANESTHESIOLOGY* 1993; 79:211-3

391. Yamamoto T, Nozaki-Taguchi N: Role of spinal cyclooxygenase (COX)-2 on thermal hyperalgesia evoked by carageenan injection in the rat. *Neuroreport* 1997; 8:2179-82

392. Malmberg AB, Yaksh TL: Hyperalgesia mediated by spinal glutamate or substance P receptor blocked by spinal cyclooxygenase inhibition. *Science* 1992; 257:1276-9

393. Poddubiuk ZM, Kleinrok Z: A comparison of the central actions of prostaglandins A2, E1, E2, F1, and F2 in the rat. *Psychopharmacology* 1976; 50:95-102

394. Eisenach JC: Aspirin, the miracle drug: Spinally, too? *ANESTHESIOLOGY* 1993; 79:211-3

395. Schuman EM, Madison DV: Nitric oxide and synaptic function. *Ann Rev Neurosci* 1994; 17:153-83

396. Zhuo M, Small SA, Kandell ER, Hawkins RD: Nitric oxide and carbon monoxide produce long-term enhancement of synaptic transmission in the hippocampus by an activity-dependent mechanism. *Science* 1993; 260:1946-9

397. Synder SH, Jaffrey SR, Zakhary R: Nitric oxide and carbon monoxide: Parallel roles as neural messengers. *Brain Res Rev* 1998; 26:167-75

398. Aimar P, Pasti L, Carmignoto G, Merighi A: Nitric oxide-producing islet cells modulate the release of sensory neuropeptides in the rat substantia gelatinosa. *J Neurosci* 1998; 18:10375-88

399. Choi Y, Raja SN, Moore LC, Tobin JR: Neuropathic pain in rats is associated with altered nitric oxide synthase activity in neural tissue. *J Neurol Sci* 1996; 138:14-20

400. Gordh T, Sharma HS, Alm P, Westman J: Spinal nerve lesion induces upregulation of neuronal nitric oxide synthase in the spinal

cord. An immunohistochemical investigation in the rat. *Amino Acids* 1998; 14:105-12

401. Meller ST, Pechman PS, Gebhart GF, Maves TJ: Nitric oxide mediates the thermal hyperalgesia produced in a model of neuropathic pain in the rat. *Neuroscience* 1992; 50:7-10

402. Yamamoto T, Shimoyama N, Mizuguchi T: Nitric oxide synthase inhibitor blocks spinal sensitization induced by formalin injection into the rat paw. *Anesth Analg* 1993; 77:886-90

403. Yaksh TL, Malmberg AB: Spinal nitric oxide synthesis inhibition blocks NMDA-induced thermal hyperalgesia and produces antinociception in the formalin test in rats. *Pain* 1993; 54:291-300

404. Yamamoto T, Nozaki-Taguchi N: Zinc protoporphyrin IX, an inhibitor of the enzyme that produces carbon monoxide, blocks spinal nociceptive transmission evoked by formalin injection in the rat. *Brain Res* 1995; 704:256-62

405. Langerman L, Golomb E, Benita S: Significant prolongation of the pharmacologic effect of tetracaine using a lipid solution of the agent. *ANESTHESIOLOGY* 1991; 74:105-7

406. Langerman L, Golomb E, Benita S: Prolongation of the pharmacologic effect of meperidine by the use of a lipid solution of it. *ANESTHESIOLOGY* 1991; 72:635-8

407. Masters DB, Berde CB, Dutta S, Turek T, Langer R: Sustained local anesthetic release from bioerodible polymer matrices: A potential method for prolonged regional analgesia. *Pharmacol Res* 1993; 10:1527-32

408. Sato S, Baba Y, Tajima K, Kimura T, Tsuji MH, Kohda Y, Sato Y: Prolongation of epidural anesthesia in the rabbit with the use of a biodegradable copolymer paste containing lidocaine. *Anesth Analg* 1995; 80:97-101

409. Lesser GL, Grossman SA, Leong KW, Lo H, Eller S: In vitro and in vivo studies of subcutaneous hydromorphone implants designed for the treatment of cancer pain. *Pain* 1996; 65:265-72

410. Wu HH, Lester BR, Wilcox GL: Antinociception following implantation of mouse B16 melanoma cells in mouse and rat spinal cord. *Pain* 1994; 56:203-10

411. Pappas GD, Lazorthes Y, Bes JC, Tafani M, Winnie AP: Relief of intractable cancer pain by human chromaffin cell transplants: Experience at two medical centers. *Neurolog Res* 1997; 19:71-7
